# Supplementary material for: Identification and immune landscape of sarcopenia-related molecular clusters in inflammatory bowel disease by machine learning
Source: Research Square preprint supplement (doi:10.21203/rs.3.rs-3435396/v1), 2023-10-17
Supplement: Supplementary file 1 [file 096d07e58a497224c67ad171.xlsx]

## Sheet: Supplementary Table S1
Supplementary Table S1. Summary of 164 recognized sarcopenia-related genes
Gene	Type
SUPV3L1	sarcopenia
FOXO4	sarcopenia
AR	sarcopenia
BAX	sarcopenia
MFN2	sarcopenia
EIF2B5	sarcopenia
AK1	sarcopenia
BCL2	sarcopenia
EIF2S1	sarcopenia
AIFM1	sarcopenia
FIS1	sarcopenia
NFKBIA	sarcopenia
PPARGC1A	sarcopenia
OPA1	sarcopenia
ATP5F1A	sarcopenia
ALB	sarcopenia
MSTN	sarcopenia
CRP	sarcopenia
CST3	sarcopenia
IGF1	sarcopenia
PTH	sarcopenia
COPD	sarcopenia
IL6	sarcopenia
TNF	sarcopenia
VDR	sarcopenia
HGS	sarcopenia
GH1	sarcopenia
GPT	sarcopenia
ADIPOQ	sarcopenia
REN	sarcopenia
TTR	sarcopenia
MTOR	sarcopenia
PRKAA1	sarcopenia
IL2	sarcopenia
TP53	sarcopenia
MIP	sarcopenia
LEP	sarcopenia
SOD1	sarcopenia
CXCL8	sarcopenia
IL15	sarcopenia
ESR1	sarcopenia
AGT	sarcopenia
AFP	sarcopenia
NLRP3	sarcopenia
CALCR	sarcopenia
DMD	sarcopenia
ACE	sarcopenia
ZMYM2	sarcopenia
BEST1	sarcopenia
FBXO32	sarcopenia
CD6	sarcopenia
BCHE	sarcopenia
SQSTM1	sarcopenia
PIK3CG	sarcopenia
ACE2	sarcopenia
APLN	sarcopenia
RENBP	sarcopenia
RPS6	sarcopenia
ACTN3	sarcopenia
NLN	sarcopenia
PLAT	sarcopenia
TLR9	sarcopenia
YIPF1	sarcopenia
PDP1	sarcopenia
SMN1	sarcopenia
CD38	sarcopenia
PRKAA2	sarcopenia
HACD1	sarcopenia
PRKAB1	sarcopenia
CMAS	sarcopenia
FAM20C	sarcopenia
S100B	sarcopenia
CCK	sarcopenia
BUB1B	sarcopenia
TGFB1	sarcopenia
THAS	sarcopenia
CALR	sarcopenia
PNPLA3	sarcopenia
TPI1	sarcopenia
ATP6AP2	sarcopenia
ASPSCR1	sarcopenia
FZD5	sarcopenia
TPMT	sarcopenia
TWIST1	sarcopenia
FZD1	sarcopenia
TRIM63	sarcopenia
BMP2	sarcopenia
SLC12A2	sarcopenia
WNK1	sarcopenia
SLC5A2	sarcopenia
SLC6A8	sarcopenia
RUNX1	sarcopenia
CAV1	sarcopenia
PRSS12	sarcopenia
ORAI1	sarcopenia
SMN2	sarcopenia
SNAP25	sarcopenia
VEGFA	sarcopenia
GDF11	sarcopenia
EIF4EBP2	sarcopenia
EPO	sarcopenia
FABP4	sarcopenia
DKK1	sarcopenia
FOXO1	sarcopenia
SIRT1	sarcopenia
ANGPTL2	sarcopenia
BRD4	sarcopenia
SMUG1	sarcopenia
NUP62	sarcopenia
GABPA	sarcopenia
TPSG1	sarcopenia
DKK3	sarcopenia
EIF3K	sarcopenia
EIF4EBP1	sarcopenia
AHSG	sarcopenia
METTL21C	sarcopenia
CEACAM5	sarcopenia
CAP1	sarcopenia
SORBS1	sarcopenia
KHDRBS1	sarcopenia
CLU	sarcopenia
PLIN2	sarcopenia
PTRH1	sarcopenia
CTAA1	sarcopenia
CTNNB1	sarcopenia
CTSL	sarcopenia
GADD45A	sarcopenia
DNAH8	sarcopenia
EBM	sarcopenia
EGFR	sarcopenia
NR3C1	sarcopenia
CD274	sarcopenia
MFGE8	sarcopenia
MMP3	sarcopenia
MSRA	sarcopenia
MTHFR	sarcopenia
NCAM1	sarcopenia
ACLY	sarcopenia
NFE2L2	sarcopenia
NM	sarcopenia
OSM	sarcopenia
DCTN4	sarcopenia
PFKFB3	sarcopenia
SERPINB6	sarcopenia
PIK3CA	sarcopenia
PIK3CB	sarcopenia
ARSA	sarcopenia
MIR21	sarcopenia
ARNTL	sarcopenia
GTF2H1	sarcopenia
HFE	sarcopenia
HLA-DQA1	sarcopenia
HSD11B1	sarcopenia
HSPA1A	sarcopenia
IFNG	sarcopenia
IL1A	sarcopenia
IL4	sarcopenia
IL10	sarcopenia
ILK	sarcopenia
INSRR	sarcopenia
KRT19	sarcopenia
LMNA	sarcopenia
LNPEP	sarcopenia
PIK3CD	sarcopenia

## Sheet: Supplementary Table S2
Supplementary Table S2. The activation states of biological pathways in distinct IBD clusters by GSVA enrichment analysis
Pathway	logFC	AveExpr	t	P.Value	adj.P.Val	B
KEGG_LEISHMANIA_INFECTION	0.305024	0.498438	32.9877	3.35714e-155	6.04285e-153	344.182
KEGG_CYTOKINE_CYTOKINE_RECEPTOR_INTERACTION	0.209454	0.500503	31.3166	1.48242e-144	1.33418e-142	319.724
KEGG_TOLL_LIKE_RECEPTOR_SIGNALING_PATHWAY	0.207904	0.499572	29.6821	4.14934e-134	2.48961e-132	295.721
KEGG_JAK_STAT_SIGNALING_PATHWAY	0.189254	0.499584	28.8766	5.89543e-129	2.65294e-127	283.883
KEGG_NOD_LIKE_RECEPTOR_SIGNALING_PATHWAY	0.226076	0.501176	28.6694	1.24615e-127	4.48613e-126	280.838
KEGG_CHEMOKINE_SIGNALING_PATHWAY	0.179263	0.501785	27.3992	1.62805e-119	4.88416e-118	262.191
KEGG_HEMATOPOIETIC_CELL_LINEAGE	0.245513	0.500461	26.4326	2.35402e-113	6.05319e-112	248.038
KEGG_CELL_ADHESION_MOLECULES_CAMS	0.204896	0.501461	24.1164	1.04383e-98	2.34862e-97	214.389
KEGG_SYSTEMIC_LUPUS_ERYTHEMATOSUS	0.249614	0.505269	23.6984	4.34206e-96	8.68413e-95	208.373
KEGG_BUTANOATE_METABOLISM	-0.263199	0.514883	-23.2922	1.48984e-93	2.68172e-92	202.549
KEGG_LEUKOCYTE_TRANSENDOTHELIAL_MIGRATION	0.157287	0.501379	23.1947	6.03329e-93	9.87266e-92	201.154
KEGG_GRAFT_VERSUS_HOST_DISEASE	0.31331	0.505593	22.7795	2.28537e-90	3.42806e-89	195.232
KEGG_NATURAL_KILLER_CELL_MEDIATED_CYTOTOXICITY	0.18128	0.502159	22.6862	8.65744e-90	1.15064e-88	193.903
KEGG_APOPTOSIS	0.150423	0.501459	22.6838	8.94943e-90	1.15064e-88	193.87
KEGG_B_CELL_RECEPTOR_SIGNALING_PATHWAY	0.213117	0.497852	22.5941	3.21531e-89	3.85837e-88	192.594
KEGG_PYRUVATE_METABOLISM	-0.209411	0.510172	-22.3158	1.68113e-87	1.89128e-86	188.648
KEGG_PROXIMAL_TUBULE_BICARBONATE_RECLAMATION	-0.225143	0.507926	-22.2412	4.84402e-87	5.12896e-86	187.592
KEGG_PROPANOATE_METABOLISM	-0.249324	0.51557	-22.2222	6.34613e-87	6.34613e-86	187.323
KEGG_COMPLEMENT_AND_COAGULATION_CASCADES	0.167402	0.503333	22.0242	1.04815e-85	9.92983e-85	184.525
KEGG_TYPE_I_DIABETES_MELLITUS	0.253565	0.504189	21.7939	2.70974e-84	2.43877e-83	181.281
KEGG_INTESTINAL_IMMUNE_NETWORK_FOR_IGA_PRODUCTION	0.255033	0.502769	21.7228	7.38203e-84	6.32746e-83	180.282
KEGG_ALLOGRAFT_REJECTION	0.279241	0.504526	20.9701	2.81777e-79	2.30545e-78	169.76
KEGG_ECM_RECEPTOR_INTERACTION	0.19469	0.497447	20.4164	6.11581e-76	4.78628e-75	162.099
KEGG_CITRATE_CYCLE_TCA_CYCLE	-0.268446	0.514241	-19.8524	1.42601e-72	1.0695e-71	154.367
KEGG_ASCORBATE_AND_ALDARATE_METABOLISM	-0.24193	0.512881	-19.6592	1.99162e-71	1.38796e-70	151.738
KEGG_FATTY_ACID_METABOLISM	-0.217605	0.513204	-19.6587	2.00483e-71	1.38796e-70	151.731
KEGG_VALINE_LEUCINE_AND_ISOLEUCINE_DEGRADATION	-0.226675	0.516079	-19.5675	6.94031e-71	4.62687e-70	150.493
KEGG_CYTOSOLIC_DNA_SENSING_PATHWAY	0.149588	0.502455	19.5063	1.59518e-70	1.02548e-69	149.664
KEGG_AUTOIMMUNE_THYROID_DISEASE	0.215474	0.505838	19.3839	8.3967e-70	5.21175e-69	148.008
KEGG_ASTHMA	0.227265	0.500873	19.3536	1.2656e-69	7.5936e-69	147.599
KEGG_PRION_DISEASES	0.149357	0.502397	19.2884	3.06221e-69	1.77806e-68	146.718
KEGG_CARDIAC_MUSCLE_CONTRACTION	-0.156262	0.505243	-19.2519	5.01132e-69	2.81887e-68	146.227
KEGG_MATURITY_ONSET_DIABETES_OF_THE_YOUNG	-0.200448	0.512239	-19.1836	1.26061e-68	6.87603e-68	145.307
KEGG_PEROXISOME	-0.202486	0.509535	-18.7022	8.09707e-66	4.28668e-65	138.862
KEGG_SMALL_CELL_LUNG_CANCER	0.111485	0.501361	18.1269	1.67494e-62	8.61397e-62	131.253
KEGG_PENTOSE_AND_GLUCURONATE_INTERCONVERSIONS	-0.199608	0.513818	-17.9353	2.08062e-61	1.04031e-60	128.742
KEGG_T_CELL_RECEPTOR_SIGNALING_PATHWAY	0.151877	0.49844	17.7131	3.80748e-60	1.80354e-59	125.845
KEGG_ANTIGEN_PROCESSING_AND_PRESENTATION	0.188164	0.50777	17.6894	5.18463e-60	2.39291e-59	125.537
KEGG_FOCAL_ADHESION	0.128168	0.499972	17.5572	2.89539e-59	1.30293e-58	123.823
KEGG_PATHOGENIC_ESCHERICHIA_COLI_INFECTION	0.164846	0.504178	16.9125	1.16535e-55	5.11619e-55	115.553
KEGG_BETA_ALANINE_METABOLISM	-0.157567	0.507936	-16.1331	2.15554e-51	9.23802e-51	105.766
KEGG_ACUTE_MYELOID_LEUKEMIA	0.123495	0.501774	16.1123	2.79387e-51	1.16953e-50	105.508
KEGG_HISTIDINE_METABOLISM	-0.153169	0.510943	-16.0197	8.8278e-51	3.61137e-50	104.362
KEGG_DRUG_METABOLISM_CYTOCHROME_P450	-0.184601	0.50228	-15.9434	2.27014e-50	9.08057e-50	103.421
KEGG_GLYCEROPHOSPHOLIPID_METABOLISM	-0.125049	0.504946	-15.8704	5.5989e-50	2.19087e-49	102.522
KEGG_HUNTINGTONS_DISEASE	-0.134946	0.508234	-15.6825	5.64756e-49	2.1629e-48	100.221
KEGG_RIG_I_LIKE_RECEPTOR_SIGNALING_PATHWAY	0.118351	0.502268	15.6166	1.26585e-48	4.74695e-48	99.417
KEGG_CHRONIC_MYELOID_LEUKEMIA	0.116066	0.501037	15.5568	2.62777e-48	9.65305e-48	98.6897
KEGG_PROTEIN_EXPORT	0.217481	0.50378	15.425	1.30888e-47	4.71195e-47	97.0911
KEGG_METABOLISM_OF_XENOBIOTICS_BY_CYTOCHROME_P450	-0.181363	0.500643	-15.2368	1.27836e-46	4.51187e-46	94.8222
KEGG_PANCREATIC_CANCER	0.101247	0.503537	15.1522	3.54401e-46	1.22677e-45	93.807
KEGG_PRIMARY_IMMUNODEFICIENCY	0.20591	0.497512	15.0922	7.28643e-46	2.47464e-45	93.0896
KEGG_LYSINE_DEGRADATION	-0.121427	0.507577	-15.0613	1.05565e-45	3.51884e-45	92.7205
KEGG_TERPENOID_BACKBONE_BIOSYNTHESIS	-0.212112	0.507369	-15.0378	1.3983e-45	4.57624e-45	92.4407
KEGG_OXIDATIVE_PHOSPHORYLATION	-0.166551	0.508698	-14.7652	3.59572e-44	1.13549e-43	89.2087
KEGG_TYROSINE_METABOLISM	-0.117109	0.505923	-14.7597	3.84027e-44	1.19181e-43	89.1432
KEGG_PARKINSONS_DISEASE	-0.164577	0.509998	-14.7272	5.63905e-44	1.72039e-43	88.7608
KEGG_RETINOL_METABOLISM	-0.163243	0.503283	-14.6782	1.0062e-43	3.01859e-43	88.1845
KEGG_PROTEASOME	0.206983	0.50752	14.486	9.64773e-43	2.84687e-42	85.9349
KEGG_GLYCOSPHINGOLIPID_BIOSYNTHESIS_GLOBO_SERIES	0.149557	0.494908	14.3453	4.99044e-42	1.44884e-41	84.2996
KEGG_GLYCOSPHINGOLIPID_BIOSYNTHESIS_GANGLIO_SERIES	0.154312	0.499612	13.964	4.08516e-40	1.14895e-39	79.917
KEGG_SELENOAMINO_ACID_METABOLISM	-0.136206	0.509412	-13.1443	4.09721e-36	1.10074e-35	70.7545
KEGG_GLYCEROLIPID_METABOLISM	-0.109442	0.50765	-13.0322	1.40456e-35	3.71794e-35	69.5297
KEGG_TRYPTOPHAN_METABOLISM	-0.105597	0.511974	-13.0038	1.91755e-35	5.00232e-35	69.2202
KEGG_DRUG_METABOLISM_OTHER_ENZYMES	-0.114805	0.506027	-12.8739	7.90427e-35	2.03253e-34	67.8123
KEGG_ARGININE_AND_PROLINE_METABOLISM	-0.103876	0.511289	-12.5345	3.06267e-33	7.65668e-33	64.178
KEGG_GLYCOSAMINOGLYCAN_BIOSYNTHESIS_KERATAN_SULFATE	0.107552	0.499823	11.5821	6.08725e-29	1.44172e-28	54.3484
KEGG_PORPHYRIN_AND_CHLOROPHYLL_METABOLISM	-0.105379	0.506144	-10.976	2.47203e-26	5.36103e-26	48.3884
KEGG_LINOLEIC_ACID_METABOLISM	-0.139531	0.503671	-10.8688	6.97598e-26	1.49485e-25	47.3596
KEGG_GLYCOSAMINOGLYCAN_DEGRADATION	0.103448	0.498401	10.2051	3.62248e-23	7.67114e-23	41.1623
KEGG_GLYCOSYLPHOSPHATIDYLINOSITOL_GPI_ANCHOR_BIOSYNTHESIS	-0.113187	0.509094	-10.0252	1.87333e-22	3.87585e-22	39.5348
KEGG_STEROID_HORMONE_BIOSYNTHESIS	-0.100082	0.504147	-9.48941	2.18234e-20	4.26979e-20	34.8256
KEGG_STEROID_BIOSYNTHESIS	-0.116017	0.505976	-8.78143	8.52148e-18	1.53387e-17	28.9274
KEGG_GLYCOSAMINOGLYCAN_BIOSYNTHESIS_CHONDROITIN_SULFATE	0.107601	0.495305	8.69907	1.66514e-17	2.96757e-17	28.266
KEGG_AMINOACYL_TRNA_BIOSYNTHESIS	-0.1102	0.50313	-6.78554	2.14334e-11	3.20318e-11	14.4227

## Sheet: Supplementary Table S3
Table S3. The marker gene for each cell cluster
p_val	avg_log2FC	pct.1	pct.2	p_val_adj	cluster	gene
p_val	avg_log2FC	pct.1	pct.2	p_val_adj	cluster	gene
0	2.65832	0.967	0.08	0	0	MS4A1
0	2.49649	0.873	0.063	0	0	BANK1
0	2.39185	0.762	0.046	0	0	VPREB3
0	2.38944	0.994	0.243	0	0	HLA-DRA
0	2.3796	0.912	0.115	0	0	HLA-DQA1
0	2.12173	0.977	0.248	0	0	HLA-DPB1
0	2.04869	0.948	0.222	0	0	HLA-DQB1
0	2.03883	0.971	0.253	0	0	HLA-DPA1
0	2.03846	0.981	0.274	0	0	HLA-DRB1
0	2.02814	0.933	0.249	0	0	CD83
0	1.98007	0.698	0.125	0	0	LY9
0	1.84835	0.831	0.159	0	0	RALGPS2
0	1.81393	0.509	0.028	0	0	ARHGAP24
0	1.79618	0.56	0.054	0	0	TNFRSF13C
0	1.77487	0.635	0.098	0	0	SMIM14
0	1.76955	0.602	0.066	0	0	SWAP70
0	1.76017	0.581	0.059	0	0	CD22
0	1.73914	0.618	0.108	0	0	HLA-DRB5
0	1.72744	0.594	0.066	0	0	HLA-DMB
0	1.71504	0.82	0.166	0	0	MEF2C
0	1.71456	0.47	0.033	0	0	LINC00926
0	1.70774	0.608	0.085	0	0	IRF8
0	1.63391	0.524	0.071	0	0	ADAM28
0	1.62781	0.42	0.03	0	0	FCRL1
0	1.62758	0.458	0.033	0	0	BCL11A
0	1.61915	0.489	0.068	0	0	PHACTR1
0	1.59519	0.996	0.506	0	0	CD74
0	1.59172	0.437	0.03	0	0	PAX5
0	1.57643	0.465	0.04	0	0	LY86
0	1.55531	0.718	0.168	0	0	CD79B
0	1.54857	0.807	0.169	0	0	CD79A
0	1.54266	0.482	0.058	0	0	AFF3
0	1.50046	0.68	0.152	0	0	HLA-DMA
0	1.4799	0.412	0.045	0	0	HVCN1
0	1.4769	0.319	0.013	0	0	AC079767.4
0	1.45448	0.34	0.04	0	0	HLA-DQA2
0	1.44953	0.4	0.035	0	0	CTA-250D10.23
0	1.42698	0.548	0.109	0	0	TCF4
0	1.42061	0.458	0.068	0	0	LYL1
0	1.41645	0.476	0.072	0	0	CD40
0	1.41044	0.279	0.011	0	0	RP5-887A10.1
0	1.40846	0.594	0.126	0	0	BASP1
0	1.36514	0.374	0.041	0	0	MARCH1
0	1.36073	0.601	0.169	0	0	SNX2
0	1.35606	0.494	0.088	0	0	LYN
0	1.35016	0.339	0.025	0	0	SPIB
0	1.34576	0.389	0.045	0	0	PKIG
0	1.32163	0.29	0.025	0	0	FCER2
0	1.31171	0.366	0.038	0	0	BLK
0	1.31106	0.371	0.041	0	0	CD19
0	1.30418	0.342	0.039	0	0	CD72
0	1.30284	0.315	0.03	0	0	RP11-693J15.5
0	1.30133	0.427	0.061	0	0	CYBB
0	1.30064	0.686	0.225	0	0	POU2F2
0	1.29655	0.31	0.024	0	0	GAPT
0	1.27271	0.372	0.044	0	0	PDLIM1
0	1.27047	0.977	0.584	0	0	CD37
0	1.25294	0.303	0.029	0	0	TNFRSF13B
0	1.23028	0.539	0.169	0	0	OTUD1
0	1.2289	0.68	0.253	0	0	RASGEF1B
0	1.22593	0.392	0.068	0	0	BLNK
0	1.19439	0.324	0.039	0	0	PAWR
0	1.18161	0.281	0.021	0	0	EBF1
0	1.1799	0.265	0.015	0	0	KIAA0226L
0	1.16315	0.256	0.019	0	0	FAM129C
0	1.15969	0.295	0.029	0	0	TLR10
0	1.15937	0.653	0.251	0	0	NFKBID
0	1.14849	0.408	0.111	0	0	TCOF1
0	1.14118	0.27	0.021	0	0	CR1
0	1.13556	0.397	0.083	0	0	LAT2
0	1.11207	0.45	0.118	0	0	MARCKS
0	1.10467	0.315	0.05	0	0	FAM26F
0	1.10127	0.465	0.136	0	0	CCDC50
0	1.09706	0.287	0.041	0	0	TSPAN13
0	1.08918	0.343	0.069	0	0	COBLL1
0	1.08836	0.261	0.027	0	0	CR2
0	1.0874	0.54	0.179	0	0	SYPL1
0	1.08649	0.352	0.077	0	0	KDM4B
0	1.07889	0.429	0.114	0	0	PARP15
0	1.07593	0.684	0.278	0	0	CD55
0	1.07474	0.348	0.078	0	0	CHPT1
0	1.07164	0.405	0.108	0	0	STX7
0	1.06897	0.54	0.178	0	0	PLAC8
0	1.06771	0.421	0.12	0	0	STRBP
0	1.06317	0.428	0.125	0	0	DRAM2
0	1.05629	0.9	0.471	0	0	KLF2
0	1.02846	0.281	0.05	0	0	CXCR5
0	1.00483	0.261	0.038	0	0	FGD2
0	-1.34874	0.441	0.806	0	0	SRGN
0	-1.53517	0.254	0.636	0	0	S100A4
0	-1.67798	0.303	0.69	0	0	TNFAIP3
0	-1.86688	0.019	0.446	0	0	AAK1
0	-1.9696	0.017	0.446	0	0	CD7
0	-2.05221	0.051	0.484	0	0	ID2
0	-2.12296	0.04	0.534	0	0	FYB
0	-2.17674	0.017	0.509	0	0	CD3G
0	-2.20199	0.019	0.543	0	0	CD3E
0	-2.29602	0.022	0.419	0	0	KLRB1
0	-2.4562	0.029	0.499	0	0	IL7R
0	-2.52483	0.039	0.603	0	0	IL32
0	-2.59158	0.025	0.618	0	0	CD2
0	-2.62904	0.03	0.633	0	0	CD3D
1.51333e-305	1.01146	0.317	0.067	2.97807e-301	0	BCAS4
8.03775e-294	-1.77073	0.072	0.456	1.58175e-289	0	RORA
7.24812e-293	1.07788	0.359	0.093	1.42636e-288	0	P2RX5
3.94087e-288	1.01497	0.371	0.099	7.75524e-284	0	PIKFYVE
9.88723e-288	-1.45803	0.165	0.543	1.94571e-283	0	HCST
5.50286e-283	1.09138	0.28	0.056	1.08291e-278	0	STAG3
8.06399e-280	-1.61198	0.132	0.51	1.58691e-275	0	RGCC
1.59294e-277	1.01765	0.255	0.046	3.13475e-273	0	MTSS1
2.15206e-275	-1.48743	0.128	0.494	4.23503e-271	0	FYN
8.07264e-270	-1.72821	0.049	0.413	1.58862e-265	0	LINC00152
7.0585e-260	-1.82464	0.011	0.357	1.38904e-255	0	GIMAP7
1.37934e-257	-1.83886	0.021	0.367	2.7144e-253	0	MAF
1.85728e-256	-1.40759	0.143	0.506	3.65495e-252	0	SYNE2
3.77117e-247	-1.59047	0.018	0.353	7.42128e-243	0	CD247
2.75785e-245	-1.62511	0.01	0.34	5.42717e-241	0	BCL11B
6.65821e-239	-1.73024	0.015	0.34	1.31027e-234	0	ICOS
1.40165e-233	-1.31615	0.134	0.475	2.7583e-229	0	LEPROTL1
2.50132e-232	-2.03691	0.019	0.339	4.92235e-228	0	ANXA1
4.11441e-225	-1.0341	0.375	0.65	8.09674e-221	0	S100A6
2.6597e-208	-1.57108	0.027	0.326	5.23403e-204	0	PRDM1
7.95411e-204	-1.4483	0.031	0.327	1.56529e-199	0	SLFN5
3.41592e-202	-1.53368	0.01	0.296	6.72218e-198	0	GIMAP4
2.44506e-201	-1.6207	0.027	0.318	4.81163e-197	0	PHLDA1
6.04213e-197	-1.43133	0.018	0.302	1.18903e-192	0	GPRIN3
5.04989e-193	-1.10622	0.251	0.545	9.93768e-189	0	ARL4C
6.65767e-193	-1.40328	0.009	0.284	1.31016e-188	0	GZMM
7.11419e-192	-1.23883	0.084	0.382	1.4e-187	0	LCK
2.25132e-190	-1.34465	0.012	0.286	4.43038e-186	0	PRKCH
8.82403e-189	-1.4317	0.058	0.346	1.73648e-184	0	MT2A
8.4016e-188	-1.37868	0.06	0.345	1.65335e-183	0	CCDC64
4.35158e-187	-1.21023	0.15	0.44	8.56347e-183	0	SPOCK2
5.86188e-187	-1.33075	0.032	0.311	1.15356e-182	0	LCP2
5.85916e-180	-1.29793	0.016	0.28	1.15302e-175	0	LAT
3.75398e-177	-1.3406	0.01	0.267	7.38746e-173	0	CD28
1.23797e-175	-1.01732	0.335	0.589	2.43621e-171	0	VMP1
4.3732e-172	-1.30151	0.037	0.3	8.60602e-168	0	SYTL3
4.73118e-171	-1.26717	0.148	0.424	9.3105e-167	0	S100A11
2.3317e-169	-1.31605	0.007	0.255	4.58855e-165	0	ITK
2.77484e-168	-1.25811	0.066	0.335	5.46061e-164	0	ITM2A
3.26102e-167	-1.38081	0.022	0.273	6.41735e-163	0	TNFRSF18
8.77964e-167	-1.14359	0.16	0.454	1.72775e-162	0	H1FX
2.49681e-162	-1.3313	0.039	0.292	4.91347e-158	0	FOSL2
2.61265e-161	-1.11509	0.075	0.348	5.14144e-157	0	SKAP1
4.12477e-158	-1.37413	0.022	0.263	8.11714e-154	0	TNFRSF4
1.19308e-154	-1.41737	0.016	0.25	2.34786e-150	0	CTLA4
4.5596e-152	-1.11651	0.125	0.387	8.97283e-148	0	LIMS1
2.82565e-149	-1.20068	0.03	0.265	5.5606e-145	0	OXNAD1
6.67374e-139	-1.12549	0.045	0.276	1.31333e-134	0	CD96
1.67566e-138	-1.08623	0.13	0.376	3.29753e-134	0	CTSC
1.46264e-135	-1.21871	0.041	0.265	2.87832e-131	0	NUCB2
7.33832e-135	-1.19789	0.072	0.302	1.44411e-130	0	BATF
1.2043e-133	-1.72946	0.062	0.28	2.36994e-129	0	CCL5
4.71015e-132	-1.05586	0.037	0.258	9.26911e-128	0	IQGAP2
1.20767e-131	-1.14829	0.084	0.314	2.37656e-127	0	AHR
1.82695e-123	-1.0914	0.143	0.37	3.59526e-119	0	PTGER4
8.97597e-123	-1.22598	0.109	0.329	1.76638e-118	0	ANKRD28
2.07648e-121	-1.08176	0.052	0.261	4.08631e-117	0	PHACTR2
3.17626e-120	-1.05071	0.09	0.31	6.25057e-116	0	FKBP5
1.65002e-118	-1.01961	0.075	0.291	3.24707e-114	0	PDE4D
9.04699e-118	-1.3963	0.106	0.318	1.78036e-113	0	FKBP11
4.43591e-116	-1.29563	0.216	0.427	8.72943e-112	0	XBP1
3.70011e-115	-1.00062	0.16	0.386	7.28144e-111	0	CITED2
4.2213e-103	-1.20693	0.073	0.266	8.3071e-99	0	RRBP1
2.97662e-96	-1.07703	0.105	0.296	5.85769e-92	0	SDF2L1
1.55284e-43	-1.07928	0.146	0.259	3.05584e-39	0	CCL4
0	1.93422	0.501	0.079	0	1	CCL20
0	1.66958	0.846	0.254	0	1	KLRB1
0	1.61721	0.401	0.064	0	1	SPRY1
0	1.55355	0.54	0.096	0	1	AC092580.4
0	1.51101	0.682	0.206	0	1	ANXA1
0	1.33249	0.834	0.338	0	1	IL7R
0	1.26946	0.598	0.173	0	1	CCL5
0	1.26325	0.819	0.307	0	1	RORA
0	1.17448	0.576	0.19	0	1	PDE4D
0	1.16162	0.424	0.107	0	1	GZMA
0	1.13798	0.339	0.063	0	1	PRR5
0	1.10617	0.95	0.497	0	1	S100A4
0	1.09286	0.579	0.207	0	1	PHLDA1
0	1.06562	0.542	0.176	0	1	MGAT4A
0	1.06101	0.678	0.263	0	1	PTGER4
0	1.05283	0.945	0.562	0	1	TNFAIP3
0	1.05218	0.628	0.225	0	1	ANKRD28
0	1.04689	0.541	0.177	0	1	CD96
0	1.04657	0.384	0.09	0	1	AMICA1
1.50727e-305	1.14008	0.298	0.058	2.96616e-301	1	CEBPD
5.08929e-266	1.18149	0.366	0.099	1.00152e-261	1	IFNG
1.55378e-249	-1.40927	0.375	0.631	3.05769e-245	1	CD74
5.61156e-232	-1.85084	0.009	0.328	1.1043e-227	1	MEF2C
6.01901e-219	-1.76779	0.019	0.327	1.18448e-214	1	CD79A
3.17338e-218	-1.70939	0.016	0.322	6.24488e-214	1	RALGPS2
4.21105e-188	-1.96014	0.142	0.415	8.28692e-184	1	HLA-DRA
3.80075e-177	-1.72512	0.028	0.292	7.4795e-173	1	HLA-DQA1
6.13169e-173	-1.87115	0.016	0.271	1.20666e-168	1	MS4A1
7.60755e-165	-1.42859	0.124	0.388	1.49709e-160	1	HLA-DQB1
5.93076e-163	-1.46093	0.164	0.415	1.16711e-158	1	HLA-DPA1
2.76117e-160	-1.52422	0.165	0.411	5.4337e-156	1	HLA-DPB1
2.75766e-159	-1.46406	0.188	0.434	5.42681e-155	1	HLA-DRB1
3.05769e-144	-1.27162	0.062	0.3	6.01722e-140	1	CD79B
7.73403e-129	-1.18139	0.058	0.277	1.52198e-124	1	HLA-DMA
1.32112e-112	-1.3454	0.381	0.556	2.59983e-108	1	IGLL5
6.02214e-72	-1.52227	0.107	0.256	1.1851e-67	1	MZB1
3.18235e-53	-1.39934	0.24	0.361	6.26254e-49	1	IGJ
1.12784e-243	1.1712	0.741	0.384	2.21948e-239	2	IL7R
2.2977e-232	1.26295	0.597	0.266	4.52165e-228	2	GIMAP7
1.71855e-210	-1.57495	0.207	0.631	3.38194e-206	2	CD74
7.31454e-166	1.16301	0.493	0.221	1.43943e-161	2	GIMAP4
3.3813e-163	-1.87488	0.066	0.429	6.65406e-159	2	HLA-DRB1
8.32387e-158	-1.791	0.054	0.409	1.63805e-153	2	HLA-DPA1
7.37477e-140	-1.74516	0.076	0.403	1.45128e-135	2	HLA-DPB1
6.23137e-136	-1.95419	0.083	0.401	1.22627e-131	2	HLA-DRA
2.07351e-126	-1.67549	0.012	0.305	4.08046e-122	2	MEF2C
8.09361e-126	-1.53744	0.066	0.375	1.59274e-121	2	HLA-DQB1
1.78941e-115	-1.54801	0.025	0.304	3.52138e-111	2	CD79A
9.33506e-107	-1.64803	0.016	0.274	1.83705e-102	2	HLA-DQA1
1.97858e-94	-1.1147	0.115	0.391	3.89365e-90	2	CD83
1.64134e-93	-1.19266	0.024	0.265	3.22999e-89	2	HLA-DMA
5.12781e-91	-1.28006	0.053	0.296	1.0091e-86	2	RALGPS2
7.39669e-90	-1.05893	0.043	0.294	1.45559e-85	2	ZEB2
2.88371e-89	-1.6241	0.025	0.251	5.67485e-85	2	MS4A1
3.28454e-77	-1.02442	0.056	0.279	6.46364e-73	2	CTSZ
1.48609e-75	-1.02577	0.098	0.34	2.92447e-71	2	LGALS1
1.40839e-66	-1.52839	0.056	0.251	2.77157e-62	2	MZB1
2.26881e-66	1.15051	0.342	0.186	4.4648e-62	2	TNF
0	1.76761	0.511	0.068	0	3	IL2RA
0	1.68401	0.445	0.021	0	3	FOXP3
0	1.68104	0.406	0.034	0	3	RTKN2
0	1.65691	0.743	0.157	0	3	CTLA4
0	1.65169	0.423	0.031	0	3	IL1R1
0	1.56578	0.74	0.215	0	3	BATF
0	1.4993	0.653	0.145	0	3	MIR4435-1HG
0	1.49799	0.467	0.065	0	3	IKZF2
0	1.49657	0.677	0.145	0	3	TBC1D4
0	1.49417	0.604	0.154	0	3	DUSP4
0	1.42989	0.67	0.187	0	3	TNFRSF18
0	1.41115	0.643	0.18	0	3	TNFRSF4
0	1.31448	0.59	0.159	0	3	TIGIT
0	1.28645	0.786	0.26	0	3	MAF
0	1.27565	0.624	0.194	0	3	ZC3H12D
0	1.2638	0.442	0.087	0	3	DUSP16
0	1.25878	0.333	0.048	0	3	TNFRSF9
0	1.23276	0.396	0.072	0	3	ICA1
0	1.19374	0.311	0.032	0	3	AC017002.1
0	1.16407	0.932	0.465	0	3	IL32
0	1.10273	0.254	0.014	0	3	IL1R2
6.96987e-291	1.08747	0.836	0.411	1.3716e-286	3	ARID5B
2.99746e-288	1.19513	0.694	0.244	5.8987e-284	3	ICOS
1.05592e-286	1.08995	0.824	0.348	2.07795e-282	3	RORA
1.77233e-284	1.06255	0.77	0.309	3.48776e-280	3	LINC00152
6.34066e-266	1.02489	0.802	0.38	1.24778e-261	3	NAMPT
7.2077e-265	1.12482	0.622	0.215	1.4184e-260	3	TNFRSF1B
1.10212e-264	1.15022	0.657	0.23	2.16886e-260	3	PHLDA1
8.28791e-249	1.13013	0.421	0.102	1.63098e-244	3	GK
1.88279e-239	1.0258	0.277	0.046	3.70515e-235	3	FAM184A
1.62974e-231	1.0523	0.57	0.192	3.20716e-227	3	PHACTR2
8.48813e-231	1.0953	0.479	0.142	1.67038e-226	3	ZNRF1
3.16262e-228	1.17149	0.372	0.088	6.22373e-224	3	FRMD4B
3.73163e-228	1.05265	0.566	0.189	7.34347e-224	3	CD28
7.43345e-212	1.04928	0.611	0.245	1.46283e-207	3	PELI1
2.48201e-209	1.02098	0.67	0.3	4.88434e-205	3	CTSC
4.44596e-209	1.05584	0.606	0.25	8.7492e-205	3	UGP2
5.58493e-198	1.01249	0.362	0.093	1.09906e-193	3	MAST4
1.24831e-190	1.10602	0.487	0.17	2.45656e-186	3	CCR6
8.74518e-190	1.02002	0.554	0.22	1.72096e-185	3	CARD16
1.45524e-116	-1.73625	0.013	0.302	2.86376e-112	3	MEF2C
4.46053e-112	-1.63263	0.016	0.297	8.77788e-108	3	RALGPS2
1.27606e-97	-1.56125	0.043	0.3	2.51116e-93	3	CD79A
5.78677e-95	-1.83397	0.145	0.392	1.13878e-90	3	HLA-DRA
8.32699e-92	-1.34706	0.018	0.261	1.63867e-87	3	PLAC8
8.70466e-91	-1.59113	0.057	0.309	1.71299e-86	3	ANXA1
4.89751e-88	-1.61477	0.033	0.27	9.63781e-84	3	HLA-DQA1
3.2132e-86	-1.73695	0.02	0.25	6.32326e-82	3	MS4A1
1.76371e-82	-1.38791	0.169	0.394	3.47081e-78	3	HLA-DPA1
2.01089e-78	-1.14761	0.109	0.346	3.95724e-74	3	RASGEF1B
1.92336e-77	-1.71816	0.045	0.264	3.78499e-73	3	CCL5
4.00906e-75	-1.2888	0.145	0.364	7.88942e-71	3	HLA-DQB1
5.32442e-75	-1.38015	0.18	0.389	1.04779e-70	3	HLA-DPB1
1.74453e-72	-1.29018	0.206	0.412	3.43306e-68	3	HLA-DRB1
4.83632e-59	-1.3009	0.107	0.3	9.51739e-55	3	FKBP11
1.12537e-49	-1.52842	0.091	0.255	2.21462e-45	3	CCL4
9.61975e-41	-1.06333	0.262	0.405	1.89307e-36	3	XBP1
3.38142e-37	-1.07534	0.43	0.536	6.65431e-33	3	IGLL5
9.08191e-16	-1.14206	0.277	0.347	1.78723e-11	3	IGJ
0	1.71759	0.502	0.062	0	4	ICA1
0	1.48705	0.36	0.036	0	4	RP5-1028K7.2
0	1.47652	0.394	0.05	0	4	TOX2
0	1.45845	0.49	0.098	0	4	TSHZ2
0	1.29829	0.748	0.264	0	4	MAF
3.11473e-301	1.30504	0.557	0.157	6.12948e-297	4	TBC1D4
4.60556e-299	1.32643	0.442	0.103	9.06328e-295	4	THADA
1.0156e-279	1.01477	0.863	0.492	1.9986e-275	4	RNF19A
4.0057e-276	1.44381	0.34	0.065	7.88282e-272	4	PGM2L1
1.23543e-275	1.26685	0.549	0.163	2.4312e-271	4	TIGIT
6.07862e-271	1.23313	0.571	0.174	1.19621e-266	4	CTLA4
8.15582e-267	1.3014	0.391	0.088	1.60498e-262	4	MAGEH1
5.97001e-265	1.24139	0.44	0.11	1.17484e-260	4	PASK
2.00947e-259	1.17374	0.652	0.253	3.95444e-255	4	ITM2A
1.126e-234	1.056	0.261	0.041	2.21585e-230	4	ST8SIA1
1.28172e-221	1.15379	0.378	0.095	2.52229e-217	4	SLC9A9
1.32544e-221	1.01352	0.737	0.337	2.60833e-217	4	CD7
1.6338e-206	1.07582	0.334	0.076	3.21516e-202	4	DTHD1
4.12434e-204	1.07003	0.553	0.207	8.11629e-200	4	TRPS1
3.85735e-199	1.07898	0.537	0.191	7.59089e-195	4	TNFRSF4
2.46458e-197	1.06522	0.529	0.196	4.85005e-193	4	PHACTR2
5.71646e-189	1.08939	0.49	0.177	1.12494e-184	4	SESN3
1.78206e-187	1.0348	0.387	0.113	3.50692e-183	4	CD4
4.93829e-181	1.06282	0.545	0.23	9.71805e-177	4	CORO1B
1.13049e-134	-1.86011	0.098	0.423	2.22469e-130	4	HLA-DRB1
2.10775e-116	-1.73975	0.013	0.302	4.14784e-112	4	MEF2C
7.75947e-115	-1.63575	0.107	0.401	1.52699e-110	4	HLA-DPA1
1.85475e-108	-1.18795	0.384	0.609	3.64997e-104	4	CD74
3.88852e-108	-1.58858	0.055	0.342	7.65223e-104	4	LGALS1
5.01242e-102	-1.58307	0.124	0.395	9.86394e-98	4	HLA-DPB1
8.03247e-101	-1.11787	0.267	0.546	1.58071e-96	4	GADD45B
1.50442e-95	-1.20917	0.097	0.372	2.96054e-91	4	CD55
6.75023e-95	-1.45564	0.108	0.368	1.32838e-90	4	HLA-DQB1
9.3698e-92	-1.78147	0.147	0.392	1.84388e-87	4	HLA-DRA
1.0576e-91	-1.64837	0.027	0.271	2.08126e-87	4	HLA-DQA1
9.80585e-89	-1.55149	0.059	0.308	1.92969e-84	4	ANXA1
7.35793e-87	-1.04455	0.338	0.564	1.44797e-82	4	HERPUD1
2.0093e-84	-1.4083	0.06	0.298	3.95411e-80	4	CD79A
8.86364e-84	-1.31067	0.142	0.386	1.74428e-79	4	CD83
3.3459e-83	-1.76656	0.036	0.265	6.58439e-79	4	CCL5
2.07619e-74	-1.13781	0.037	0.254	4.08572e-70	4	LMO4
3.84842e-69	-1.08412	0.051	0.262	7.5733e-65	4	TPD52
3.21768e-68	-1.37052	0.09	0.302	6.33208e-64	4	FKBP11
1.55903e-62	-1.03721	0.061	0.259	3.06802e-58	4	HLA-DMA
2.54446e-62	-1.12721	0.091	0.29	5.00724e-58	4	RALGPS2
5.36649e-62	-1.18532	0.098	0.3	1.05607e-57	4	EGR1
1.41787e-50	-1.48786	0.087	0.256	2.79024e-46	4	CCL4
6.10588e-44	-1.14748	0.404	0.539	1.20158e-39	4	IGLL5
2.28482e-43	-1.46281	0.198	0.355	4.4963e-39	4	IGJ
9.91821e-40	-1.02869	0.254	0.405	1.9518e-35	4	XBP1
0	2.59168	0.969	0.159	0	5	MZB1
0	2.56936	0.905	0.285	0	5	IGJ
0	2.52625	0.881	0.071	0	5	DERL3
0	2.25665	0.896	0.168	0	5	RRBP1
0	2.16978	0.82	0.099	0	5	FCRL5
0	2.15492	0.666	0.04	0	5	TNFRSF17
0	2.11099	0.978	0.334	0	5	XBP1
0	2.05877	0.941	0.486	0	5	IGLL5
0	2.00637	0.738	0.102	0	5	PRDX4
0	1.98755	0.873	0.224	0	5	FKBP11
0	1.97416	0.469	0.03	0	5	RP11-731F5.2
0	1.95317	0.921	0.283	0	5	FKBP2
0	1.92284	0.669	0.089	0	5	PDK1
0	1.90908	0.558	0.019	0	5	SDC1
0	1.87204	0.832	0.215	0	5	CPEB4
0	1.84306	0.484	0.014	0	5	TXNDC5
0	1.83007	0.607	0.072	0	5	FNDC3B
0	1.82011	0.56	0.05	0	5	BHLHE41
0	1.79059	0.857	0.309	0	5	SEC11C
0	1.79005	0.709	0.129	0	5	SEL1L
0	1.76027	0.689	0.105	0	5	SLAMF7
0	1.75803	0.704	0.114	0	5	PDIA4
0	1.75034	0.488	0.057	0	5	CDK14
0	1.74314	0.726	0.144	0	5	HDLBP
0	1.73784	0.391	0.021	0	5	JSRP1
0	1.72206	0.797	0.211	0	5	SDF2L1
0	1.71483	0.856	0.251	0	5	VIMP
0	1.71424	0.826	0.24	0	5	ANKRD28
0	1.70745	0.384	0.03	0	5	HIST1H2BG
0	1.67975	0.618	0.101	0	5	CREB3L2
0	1.67415	0.632	0.102	0	5	TXNDC11
0	1.66982	0.754	0.168	0	5	ERLEC1
0	1.66515	0.59	0.108	0	5	TRIB1
0	1.65605	0.536	0.075	0	5	ZBP1
0	1.65044	0.593	0.136	0	5	HIST1H2AC
0	1.64615	0.507	0.064	0	5	CTA-292E10.6
0	1.64459	0.562	0.07	0	5	SPATS2
0	1.62458	0.661	0.136	0	5	ITM2C
0	1.62199	0.692	0.142	0	5	EAF2
0	1.60096	0.963	0.652	0	5	SSR4
0	1.59936	0.967	0.502	0	5	HERPUD1
0	1.58756	0.846	0.312	0	5	SSR3
0	1.57322	0.591	0.137	0	5	TMEM107
0	1.52836	0.439	0.026	0	5	GAS6
0	1.52805	0.461	0.06	0	5	SNORD3B-2
0	1.52714	0.665	0.144	0	5	CRELD2
0	1.52098	0.731	0.225	0	5	ZBTB38
0	1.51591	0.355	0.011	0	5	RP11-290F5.1
0	1.51294	0.364	0.051	0	5	AL928768.3
0	1.50172	0.766	0.234	0	5	LMAN1
0	1.49195	0.725	0.199	0	5	MANF
0	1.49031	0.688	0.149	0	5	PPAPDC1B
0	1.48883	0.598	0.111	0	5	POU2AF1
0	1.48864	0.728	0.194	0	5	UBE2J1
0	1.48536	0.536	0.067	0	5	SIL1
0	1.47096	0.658	0.16	0	5	FNDC3A
0	1.46613	0.98	0.572	0	5	HSP90B1
0	1.46093	0.448	0.031	0	5	SPAG4
0	1.45387	0.391	0.065	0	5	HIST1H2AG
0	1.44774	0.739	0.244	0	5	FBXW7
0	1.44142	0.39	0.056	0	5	HIST1H2BC
0	1.43737	0.585	0.111	0	5	SEC61A1
0	1.43435	0.398	0.055	0	5	ITGA6
0	1.42906	0.655	0.15	0	5	HM13
0	1.42859	0.472	0.07	0	5	SEC24D
0	1.42259	0.315	0.03	0	5	STARD5
0	1.42213	0.63	0.14	0	5	CCPG1
0	1.41705	0.738	0.194	0	5	TPD52
0	1.41509	0.426	0.076	0	5	RNU12
0	1.40512	0.368	0.047	0	5	HIST1H2BD
0	1.39457	0.36	0.028	0	5	TRAM2
0	1.33604	0.311	0.014	0	5	GAB1
0	1.32182	0.653	0.194	0	5	SELM
0	1.3078	0.55	0.101	0	5	SRPRB
0	1.3022	0.855	0.401	0	5	SPCS3
0	1.3007	0.423	0.046	0	5	MANEA
0	1.29206	0.275	0.03	0	5	HIST1H2AE
0	1.29097	0.282	0.022	0	5	HIST1H2BJ
0	1.28504	0.6	0.149	0	5	CLPTM1L
0	1.28295	0.678	0.237	0	5	C19orf10
0	1.2815	0.427	0.066	0	5	LARP1B
0	1.27398	0.635	0.181	0	5	SEL1L3
0	1.26901	0.393	0.05	0	5	CASP10
0	1.26481	0.391	0.026	0	5	CHPF
0	1.25924	0.533	0.123	0	5	CD38
0	1.25596	0.466	0.101	0	5	HSH2D
0	1.25313	0.636	0.187	0	5	NUCB2
0	1.25038	0.647	0.202	0	5	KDELR2
0	1.24387	0.281	0.022	0	5	SNORD3D
0	1.24317	0.441	0.087	0	5	SYVN1
0	1.23751	0.866	0.504	0	5	SPCS2
0	1.23493	0.339	0.048	0	5	SNORD3A
0	1.21941	0.722	0.25	0	5	P4HB
0	1.21864	0.374	0.05	0	5	PGM3
0	1.20976	0.564	0.128	0	5	TXNDC15
0	1.20873	0.772	0.227	0	5	MEF2C
0	1.19789	0.298	0.026	0	5	SLC17A9
0	1.19514	0.626	0.185	0	5	TMEM208
0	1.19401	0.685	0.227	0	5	DNAJC1
0	1.19336	0.371	0.055	0	5	CADM1
0	1.18808	0.731	0.303	0	5	PDIA6
0	1.18209	0.301	0.017	0	5	RP11-16E12.2
0	1.17606	0.268	0.031	0	5	KNTC1
0	1.17097	0.811	0.465	0	5	SPCS1
0	1.16874	0.596	0.174	0	5	KDELR1
0	1.16766	0.78	0.372	0	5	RABAC1
0	1.16108	0.524	0.122	0	5	RPN1
0	1.15411	0.377	0.047	0	5	MCEE
0	1.1268	0.371	0.046	0	5	ARSA
0	1.12118	0.299	0.011	0	5	KCNN3
0	1.10266	0.396	0.063	0	5	MEI1
0	1.0971	0.327	0.041	0	5	CPNE5
0	1.08394	0.301	0.027	0	5	CKAP4
0	1.07344	0.284	0.025	0	5	AC093818.1
0	1.06919	0.268	0.024	0	5	PKHD1L1
0	1.06749	0.872	0.568	0	5	SEC61B
0	1.06387	0.355	0.054	0	5	CLIC4
0	1.02203	0.326	0.033	0	5	C11orf24
0	1.01366	0.285	0.023	0	5	AC104699.1
0	-1.70175	0.38	0.871	0	5	PTPRC
0	-1.94706	0.241	0.778	0	5	CD69
0	-2.23581	0.166	0.779	0	5	CD52
0	-2.23856	0.099	0.688	0	5	REL
0	-2.68551	0.048	0.69	0	5	LTB
1.87805e-307	-1.46191	0.353	0.778	3.69581e-303	5	ZFAS1
4.27406e-304	1.12903	0.399	0.074	8.41092e-300	5	EIF2AK4
3.266e-303	1.24331	0.335	0.052	6.42717e-299	5	RP11-727F15.9
8.54672e-302	1.19459	0.676	0.226	1.68191e-297	5	SEC14L1
1.23544e-301	1.17002	0.744	0.273	2.43121e-297	5	LGALS1
1.59146e-301	1.04799	0.886	0.499	3.13183e-297	5	HSPA5
7.5493e-298	1.15983	0.684	0.255	1.48563e-293	5	TMED9
5.95246e-297	1.34503	0.537	0.145	1.17138e-292	5	RAB30
4.59973e-294	1.10706	0.525	0.135	9.05181e-290	5	LY96
5.0407e-293	1.06252	0.442	0.091	9.91959e-289	5	GNG7
2.4367e-292	-1.91329	0.115	0.652	4.79518e-288	5	LAPTM5
1.54868e-290	-2.51989	0.03	0.581	3.04764e-286	5	CD3D
1.01012e-289	1.05424	0.379	0.07	1.98781e-285	5	CECR1
1.19198e-289	1.00783	0.311	0.046	2.3457e-285	5	ST6GALNAC4
1.83206e-288	1.0973	0.525	0.135	3.60532e-284	5	PDXK
2.22337e-288	1.10364	0.763	0.333	4.37538e-284	5	TRAM1
6.43651e-288	-1.17391	0.487	0.805	1.26664e-283	5	PFN1
8.85544e-288	1.21495	0.574	0.16	1.74266e-283	5	MBNL2
1.37209e-287	1.23751	0.686	0.236	2.70014e-283	5	PRDM1
1.3657e-283	1.15542	0.702	0.234	2.68756e-279	5	CD79A
1.57862e-280	-1.75381	0.172	0.663	3.10657e-276	5	STK17A
3.17401e-280	1.23615	0.669	0.241	6.24614e-276	5	PABPC4
2.82059e-279	1.41871	0.359	0.068	5.55064e-275	5	CCDC144A
6.85382e-279	-2.46257	0.025	0.567	1.34876e-274	5	CD2
7.38895e-278	1.00571	0.804	0.472	1.45407e-273	5	TMEM258
2.08611e-277	1.18046	0.589	0.175	4.10525e-273	5	ELL2
3.26656e-277	-1.55142	0.258	0.711	6.42827e-273	5	CD48
3.19002e-273	1.027	0.324	0.053	6.27765e-269	5	METTL7A
4.67736e-273	1.05728	0.493	0.126	9.20458e-269	5	ALG5
5.72832e-272	1.12089	0.711	0.228	1.12728e-267	5	RALGPS2
3.04611e-270	1.10898	0.411	0.088	5.99443e-266	5	HYOU1
1.21036e-269	1.29902	0.479	0.124	2.38186e-265	5	TOR3A
1.54806e-268	1.18301	0.31	0.05	3.04643e-264	5	VEGFA
2.72799e-268	1.0272	0.293	0.044	5.36841e-264	5	DENND5B
4.64174e-268	1.08895	0.62	0.213	9.13449e-264	5	RPN2
1.25229e-267	1.618	0.69	0.325	2.46438e-263	5	HSPB1
2.27477e-264	-1.16559	0.502	0.785	4.47651e-260	5	SH3BGRL3
1.14485e-262	-2.42953	0.04	0.554	2.25296e-258	5	IL32
7.41591e-262	-1.97859	0.082	0.602	1.45938e-257	5	TUBA1A
7.89032e-261	1.01714	0.403	0.086	1.55274e-256	5	SLC38A10
3.89381e-260	1.03148	0.61	0.194	7.66263e-256	5	NPC2
1.60598e-259	1.06888	0.817	0.383	3.16042e-255	5	FAM46C
4.49637e-259	1.13507	0.413	0.093	8.84841e-255	5	UAP1
1.11827e-258	-1.62115	0.265	0.688	2.20065e-254	5	CD37
2.48553e-258	1.0597	0.636	0.218	4.89128e-254	5	DNAJC3
1.13769e-257	1.0707	0.728	0.328	2.23886e-253	5	GSTP1
1.81362e-257	1.17423	0.539	0.156	3.56902e-253	5	ACADVL
4.56227e-257	1.1591	0.509	0.141	8.9781e-253	5	FUT8
1.06043e-256	1.082	0.697	0.275	2.08681e-252	5	DNAJB9
3.42337e-256	1.05	0.733	0.338	6.73686e-252	5	CD63
4.58464e-253	1.06634	0.525	0.139	9.02212e-249	5	MARCKS
5.10715e-253	1.13444	0.28	0.043	1.00504e-248	5	CEP128
2.49557e-249	1.08298	0.704	0.327	4.91103e-245	5	KRTCAP2
6.15352e-248	1.1902	0.633	0.222	1.21095e-243	5	USP48
1.05432e-246	1.18426	0.699	0.275	2.07479e-242	5	ANKRD36
4.17168e-246	1.02588	0.296	0.049	8.20945e-242	5	HIST2H2BE
1.20883e-245	1.1074	0.593	0.192	2.37885e-241	5	ST6GAL1
1.60071e-245	1.16382	0.41	0.096	3.15003e-241	5	EIF2AK3
1.13482e-242	-1.14151	0.471	0.767	2.23321e-238	5	MYL12A
2.35515e-241	1.03862	0.622	0.225	4.6347e-237	5	PHPT1
2.05718e-240	1.01437	0.545	0.166	4.04832e-236	5	AKR1A1
2.39128e-236	1.17654	0.293	0.051	4.70579e-232	5	PTCH2
5.65723e-232	-1.49544	0.21	0.646	1.11329e-227	5	CORO1A
1.00825e-230	-2.06262	0.066	0.538	1.98414e-226	5	ARL4C
2.8131e-229	1.08445	0.325	0.064	5.5359e-225	5	CCDC88A
1.35395e-228	1.05691	0.385	0.088	2.66443e-224	5	COBLL1
1.67667e-228	-2.08138	0.02	0.498	3.29952e-224	5	CD3E
9.47843e-225	-1.5699	0.259	0.674	1.86526e-220	5	CXCR4
1.15019e-224	1.21694	0.312	0.061	2.26345e-220	5	AC062029.1
2.39484e-223	-1.816	0.056	0.528	4.71281e-219	5	EVL
4.64634e-223	1.00233	0.569	0.193	9.14353e-219	5	DNAJB11
6.74897e-223	-2.10408	0.022	0.494	1.32813e-218	5	FYB
8.38138e-222	-1.30586	0.301	0.68	1.64937e-217	5	ARHGDIB
2.87175e-221	1.03799	0.517	0.15	5.65131e-217	5	TCF4
3.0843e-221	-1.03152	0.494	0.772	6.0696e-217	5	COMMD6
8.74524e-221	1.11971	0.644	0.264	1.72098e-216	5	PIM2
3.70953e-220	-1.61951	0.134	0.588	7.29999e-216	5	ETS1
1.31336e-219	-1.74134	0.135	0.588	2.58456e-215	5	SLC2A3
2.09136e-217	1.11053	0.606	0.222	4.11559e-213	5	TP53INP1
2.32095e-216	1.04695	0.596	0.212	4.56739e-212	5	SRP54
1.81443e-214	-1.41031	0.273	0.636	3.57062e-210	5	ARPC1B
5.56703e-214	-2.11184	0.011	0.467	1.09553e-209	5	CD3G
8.22551e-214	1.06151	0.45	0.128	1.6187e-209	5	HIST1H2BK
6.34984e-211	1.21695	0.641	0.278	1.24958e-206	5	HIST1H1C
1.88341e-210	1.18842	0.296	0.058	3.70636e-206	5	RNU11
3.23386e-207	-1.73826	0.225	0.606	6.36392e-203	5	S100A4
1.34374e-203	-1.92618	0.028	0.472	2.64434e-199	5	FYN
5.77196e-203	-2.42217	0.019	0.46	1.13586e-198	5	IL7R
6.75058e-202	-1.7475	0.04	0.483	1.32845e-197	5	DEK
2.74502e-198	1.01186	0.557	0.199	5.40193e-194	5	SEC31A
1.50347e-195	1.15228	0.291	0.061	2.95869e-191	5	CXorf21
5.29144e-195	1.1318	0.718	0.374	1.0413e-190	5	H1FX
8.92395e-195	-1.44337	0.188	0.587	1.75614e-190	5	LCP1
1.18859e-194	1.14408	0.309	0.068	2.33903e-190	5	AC006129.4
1.91374e-194	1.04553	0.607	0.231	3.76604e-190	5	GLCCI1
6.11245e-190	1.09302	0.255	0.048	1.20287e-185	5	MANEA-AS1
1.39176e-188	-1.69561	0.078	0.49	2.73885e-184	5	COTL1
2.62599e-183	1.04859	0.674	0.316	5.16769e-179	5	CITED2
3.26452e-180	-1.59927	0.122	0.517	6.42425e-176	5	IFITM2
4.89777e-179	1.00568	0.412	0.12	9.63832e-175	5	HIST2H2AA3
1.84409e-177	1.028	0.441	0.139	3.62899e-173	5	AC159540.1
2.3017e-173	1.02736	0.567	0.22	4.52952e-169	5	FAM214A
1.76452e-172	-1.79551	0.031	0.427	3.4724e-168	5	SPOCK2
2.24422e-169	1.00026	0.307	0.074	4.4164e-165	5	RHBDD1
2.61925e-169	-1.57988	0.128	0.514	5.15442e-165	5	HCST
5.69315e-169	-1.84609	0.02	0.409	1.12035e-164	5	CD7
4.96361e-167	1.03249	0.496	0.181	9.7679e-163	5	IRF4
2.54126e-159	-1.49076	0.226	0.556	5.00095e-155	5	CREM
1.74415e-156	1.11084	0.284	0.071	3.43232e-152	5	KIAA0125
2.93444e-152	-2.20056	0.026	0.384	5.77469e-148	5	KLRB1
5.90323e-151	-1.54748	0.152	0.504	1.1617e-146	5	ZNF331
1.11786e-150	-1.29604	0.253	0.593	2.19983e-146	5	NR4A2
2.8621e-148	-1.2171	0.232	0.553	5.63233e-144	5	ARL6IP5
1.53807e-144	-1.583	0.015	0.363	3.02676e-140	5	LCK
4.49399e-144	-1.06127	0.311	0.622	8.84373e-140	5	ARID4B
7.33525e-140	-1.73989	0.021	0.363	1.4435e-135	5	PTGER4
1.13678e-139	-1.46199	0.077	0.425	2.23707e-135	5	FOXP1
1.60439e-139	-1.26681	0.182	0.519	3.15728e-135	5	EML4
2.09679e-130	1.31628	0.356	0.124	4.12628e-126	5	HSPA6
1.86886e-129	-1.15528	0.221	0.531	3.67773e-125	5	LRRFIP1
2.05708e-128	-1.7438	0.01	0.327	4.04813e-124	5	GIMAP7
8.39031e-124	-1.5204	0.015	0.325	1.65113e-119	5	CD247
1.41788e-122	-1.55311	0.015	0.325	2.79025e-118	5	CCDC64
3.86411e-122	-1.6943	0.027	0.336	7.60419e-118	5	MAF
9.33977e-122	-1.54131	0.008	0.312	1.83797e-117	5	BCL11B
1.2817e-120	-1.48382	0.018	0.324	2.52226e-116	5	FAM65B
1.53472e-120	-1.44733	0.016	0.322	3.02018e-116	5	TRIM22
2.39565e-120	-1.44139	0.039	0.351	4.7144e-116	5	TMEM2
4.77898e-119	-1.29662	0.138	0.443	9.40456e-115	5	SDCBP
9.46961e-119	-1.13617	0.187	0.492	1.86352e-114	5	LIMD2
1.68184e-117	-1.30544	0.115	0.416	3.3097e-113	5	RGS10
5.41688e-117	-1.21154	0.169	0.471	1.06599e-112	5	ZC3HAV1
6.99222e-117	-1.41168	0.035	0.337	1.376e-112	5	CLEC2D
5.46417e-115	-1.14443	0.182	0.479	1.07529e-110	5	CELF2
3.2812e-114	-1.60762	0.019	0.312	6.45708e-110	5	ICOS
1.79486e-113	-1.17348	0.169	0.475	3.5321e-109	5	KDM6B
9.47047e-112	-1.74651	0.108	0.396	1.86369e-107	5	HLA-DPB1
1.49449e-110	-1.23529	0.068	0.373	2.941e-106	5	LBH
5.61527e-108	-1.25868	0.107	0.398	1.10503e-103	5	GNG2
8.71933e-106	-1.86305	0.033	0.31	1.71588e-101	5	ANXA1
3.31734e-105	-1.39149	0.02	0.296	6.52819e-101	5	ARAP2
2.5495e-103	-1.31964	0.041	0.32	5.01716e-99	5	RILPL2
6.74605e-103	-1.36089	0.045	0.321	1.32756e-98	5	IFITM1
4.92954e-102	-1.47628	0.007	0.272	9.70084e-98	5	GIMAP4
1.22061e-101	-1.16748	0.248	0.492	2.40203e-97	5	S100A10
2.59221e-101	-1.1955	0.117	0.392	5.10121e-97	5	RAB8B
3.25785e-101	-1.08994	0.3	0.543	6.41113e-97	5	GPR183
9.22333e-100	-1.30178	0.022	0.288	1.81506e-95	5	LCP2
5.79605e-97	-1.13451	0.154	0.423	1.1406e-92	5	RUNX3
6.73141e-97	-1.03036	0.239	0.482	1.32467e-92	5	FXYD5
3.33131e-96	-1.30429	0.008	0.262	6.55568e-92	5	TTC39C
3.31982e-95	-1.42307	0.118	0.388	6.53307e-91	5	CD83
4.14137e-95	-1.31529	0.009	0.26	8.1498e-91	5	GZMM
7.39102e-95	-1.29086	0.158	0.415	1.45448e-90	5	RORA
1.00361e-94	-1.15082	0.2	0.439	1.975e-90	5	LEPROTL1
1.74277e-94	-1.06303	0.166	0.424	3.4296e-90	5	APBB1IP
5.0824e-94	-1.2736	0.012	0.262	1.00017e-89	5	PRKCH
1.49679e-93	-1.28667	0.01	0.259	2.94554e-89	5	CD96
2.66866e-93	-1.2989	0.011	0.26	5.25165e-89	5	SATB1
7.13513e-93	-1.29119	0.023	0.275	1.40412e-88	5	TNFRSF1B
7.55724e-93	-1.44509	0.036	0.292	1.48719e-88	5	ZEB2
2.05985e-92	-1.11459	0.174	0.428	4.05358e-88	5	RARRES3
2.21991e-91	-1.04601	0.18	0.428	4.36857e-87	5	MTPN
3.35116e-90	-1.12933	0.112	0.369	6.59476e-86	5	MBP
2.90363e-87	-1.2114	0.034	0.277	5.71405e-83	5	ALOX5AP
3.3249e-87	-1.20323	0.018	0.257	6.54308e-83	5	LAT
3.74913e-87	-1.22537	0.18	0.416	7.37792e-83	5	RPS4Y1
2.46423e-85	-1.20345	0.031	0.269	4.84936e-81	5	FAIM3
5.13314e-84	-1.36844	0.049	0.287	1.01015e-79	5	BCL2A1
1.4782e-83	-1.06511	0.15	0.398	2.90894e-79	5	ARL4A
3.24553e-81	-1.26807	0.05	0.285	6.38687e-77	5	BATF
1.04909e-80	-1.17474	0.046	0.28	2.0645e-76	5	GBP2
1.69987e-80	-1.04015	0.166	0.412	3.34517e-76	5	IVNS1ABP
1.15446e-79	-1.04876	0.111	0.357	2.27187e-75	5	PIK3IP1
2.47697e-79	-1.11186	0.186	0.434	4.87444e-75	5	ID2
1.95046e-77	-1.26004	0.037	0.258	3.83831e-73	5	PLAC8
5.36836e-77	-1.14899	0.064	0.297	1.05644e-72	5	AHR
6.88863e-76	-1.11771	0.067	0.298	1.35561e-71	5	SLFN5
1.67585e-74	-1.07505	0.123	0.351	3.29791e-70	5	PTPN22
4.93932e-72	-1.154	0.045	0.257	9.72009e-68	5	TRPS1
5.68536e-72	-1.09056	0.08	0.302	1.11882e-67	5	SLA
1.10691e-71	-1.05305	0.055	0.271	2.17829e-67	5	CCND3
8.20963e-69	-1.60521	0.194	0.386	1.61557e-64	5	HLA-DRA
2.2166e-68	-1.1315	0.047	0.252	4.36204e-64	5	ZC3H12D
3.28038e-68	-1.06244	0.055	0.258	6.45546e-64	5	SYPL1
2.81189e-67	-1.07695	0.061	0.267	5.53351e-63	5	RCAN3
3.08719e-67	-1.04365	0.079	0.288	6.07528e-63	5	ZNF267
5.13854e-67	-1.04956	0.051	0.255	1.01121e-62	5	MGAT4A
1.90392e-62	-1.00174	0.072	0.269	3.74673e-58	5	TGFBR2
9.5267e-61	-1.03401	0.082	0.287	1.87476e-56	5	PHLDA1
4.91074e-60	-1.03787	0.08	0.274	9.66385e-56	5	TCF7
8.59765e-60	-1.27943	0.243	0.408	1.69193e-55	5	HLA-DRB1
1.01155e-54	-1.39257	0.079	0.26	1.99064e-50	5	CCL5
5.99973e-45	-1.16573	0.107	0.262	1.18069e-40	5	HLA-DQA1
0	3.06086	0.84	0.033	0	6	GZMK
0	2.49807	0.884	0.104	0	6	NKG7
0	2.33953	0.964	0.195	0	6	CCL5
0	2.12385	0.782	0.119	0	6	GZMA
0	2.0897	0.455	0.02	0	6	CRTAM
0	2.08554	0.651	0.066	0	6	CD8A
0	2.04617	0.829	0.161	0	6	CST7
0	2.04029	0.63	0.111	0	6	IFNG
0	1.97675	0.469	0.034	0	6	GZMH
0	1.9087	0.534	0.043	0	6	CD8B
0	1.88942	0.776	0.204	0	6	CCL4
0	1.6599	0.434	0.054	0	6	KLRG1
0	1.45891	0.428	0.068	0	6	SAMD3
0	1.42434	0.441	0.073	0	6	CTSW
3.20917e-292	1.51038	0.286	0.03	6.31532e-288	6	XCL2
2.72318e-276	1.60847	0.554	0.148	5.35894e-272	6	CMC1
3.42261e-265	1.42387	0.6	0.178	6.73535e-261	6	APOBEC3G
9.2972e-261	1.39126	0.65	0.21	1.8296e-256	6	GZMM
3.70046e-253	1.44925	0.388	0.067	7.28214e-249	6	GZMB
1.25673e-249	1.13166	0.889	0.452	2.47312e-245	6	HCST
2.75986e-224	1.26308	0.392	0.078	5.43113e-220	6	LAG3
2.53237e-217	1.31793	0.493	0.132	4.98345e-213	6	SH2D1A
4.5432e-196	1.21457	0.378	0.082	8.94057e-192	6	DTHD1
1.69864e-186	1.11453	0.317	0.06	3.34276e-182	6	PRF1
1.05368e-156	1.16094	0.293	0.059	2.07353e-152	6	KLRD1
4.01014e-141	1.12732	0.396	0.119	7.89155e-137	6	LYAR
1.77018e-140	1.32911	0.39	0.117	3.48354e-136	6	TNFSF9
1.53732e-139	1.10104	0.558	0.234	3.02528e-135	6	LYST
3.70318e-124	1.00579	0.491	0.179	7.28749e-120	6	TIGIT
1.93442e-79	-1.73721	0.008	0.293	3.80674e-75	6	MEF2C
2.45802e-70	-1.53627	0.024	0.288	4.83713e-66	6	RALGPS2
1.21931e-68	-1.55454	0.031	0.292	2.39948e-64	6	CD79A
3.80375e-62	-1.37285	0.11	0.368	7.48539e-58	6	KLRB1
2.60852e-54	-1.11776	0.078	0.317	5.1333e-50	6	POU2F2
1.85248e-52	-1.23405	0.149	0.378	3.6455e-48	6	CD83
1.99832e-40	-1.02093	0.082	0.273	3.93249e-36	6	CD79B
2.61788e-21	-1.30407	0.22	0.349	5.15172e-17	6	IGJ
5.01733e-300	1.36553	0.471	0.077	9.87361e-296	7	LEF1
1.48502e-274	1.35058	0.754	0.228	2.92238e-270	7	TCF7
1.20952e-235	1.3604	0.611	0.164	2.38021e-231	7	CCR7
9.83454e-173	1.16787	0.563	0.175	1.93534e-168	7	SELL
2.58361e-160	1.06871	0.677	0.262	5.0843e-156	7	BCL11B
6.20949e-155	-1.79123	0.25	0.683	1.22197e-150	7	HSPA1B
1.75878e-138	1.00273	0.453	0.133	3.4611e-134	7	CAMK4
3.09928e-135	-1.71247	0.312	0.673	6.09906e-131	7	HSPA1A
2.11337e-128	1.03557	0.535	0.201	4.1589e-124	7	NOSIP
7.46522e-122	1.01158	0.491	0.171	1.46908e-117	7	AP3M2
1.31048e-82	-1.90371	0.086	0.411	2.5789e-78	7	HLA-DRB1
2.32136e-78	-1.3365	0.354	0.602	4.5682e-74	7	CD74
1.83968e-77	-1.75404	0.076	0.391	3.6203e-73	7	HLA-DPA1
3.85598e-68	-1.7105	0.011	0.291	7.58819e-64	7	MEF2C
5.42712e-61	-1.15431	0.325	0.556	1.068e-56	7	HERPUD1
1.02685e-60	-1.33226	0.093	0.367	2.02074e-56	7	LINC00152
8.25267e-60	-1.90008	0.13	0.383	1.62404e-55	7	HLA-DRA
1.46413e-59	-1.46133	0.024	0.283	2.88126e-55	7	ZEB2
6.39338e-56	-1.49738	0.043	0.29	1.25815e-51	7	CD79A
1.27448e-54	-1.00928	0.2	0.465	2.50805e-50	7	RAB11FIP1
8.30621e-53	-1.41361	0.082	0.329	1.63458e-48	7	LGALS1
8.514e-51	-1.55019	0.033	0.261	1.67547e-46	7	HLA-DQA1
6.20347e-50	-1.45567	0.16	0.382	1.22078e-45	7	HLA-DPB1
3.30178e-48	-1.30993	0.075	0.305	6.49757e-44	7	ANKRD28
7.64143e-48	-1.21261	0.032	0.253	1.50376e-43	7	HLA-DMA
1.65306e-46	-1.18521	0.159	0.385	3.25305e-42	7	CD63
4.61849e-46	-1.21348	0.054	0.273	9.08873e-42	7	CD79B
5.00955e-44	-1.23131	0.142	0.356	9.8583e-40	7	HLA-DQB1
1.04281e-40	-1.21374	0.082	0.282	2.05215e-36	7	RALGPS2
1.4986e-36	-1.01681	0.063	0.253	2.9491e-32	7	TPD52
1.37819e-34	-1.08688	0.196	0.373	2.71213e-30	7	CD83
3.96384e-30	-1.25605	0.086	0.253	7.80044e-26	7	CCL5
3.19361e-09	-1.13422	0.283	0.344	6.28471e-05	7	IGJ
0	3.68358	0.805	0.027	0	8	IL1B
0	3.60686	0.736	0.012	0	8	S100A9
0	3.37472	0.658	0.005	0	8	S100A8
0	3.3405	0.709	0.062	0	8	IL8
0	3.20227	0.697	0.028	0	8	LYZ
0	3.19252	0.659	0.007	0	8	MAFB
0	3.1805	0.629	0.015	0	8	C15orf48
0	2.99942	0.566	0.008	0	8	IL1RN
0	2.98495	0.553	0.014	0	8	CXCL2
0	2.97292	0.677	0.034	0	8	PLAUR
0	2.94896	0.547	0.003	0	8	VCAN
0	2.93153	0.786	0.07	0	8	GLUL
0	2.72525	0.687	0.046	0	8	AIF1
0	2.71634	0.687	0.042	0	8	TYROBP
0	2.70143	0.519	0.039	0	8	G0S2
0	2.66443	0.606	0.028	0	8	TNFAIP2
0	2.60347	0.719	0.117	0	8	CCL3
0	2.53487	0.524	0.07	0	8	HES1
0	2.52862	0.469	0.013	0	8	PTGS2
0	2.50867	0.564	0.033	0	8	FCER1G
0	2.5059	0.769	0.155	0	8	CTSB
0	2.50256	0.531	0.004	0	8	LILRB2
0	2.49538	0.512	0.008	0	8	SLC11A1
0	2.49076	0.504	0.002	0	8	TREM1
0	2.47855	0.701	0.123	0	8	IER3
0	2.45101	0.392	0.011	0	8	EREG
0	2.391	0.538	0.017	0	8	FCGR2A
0	2.37745	0.543	0.029	0	8	ETS2
0	2.37254	0.463	0.005	0	8	CD300E
0	2.36314	0.499	0.009	0	8	DMXL2
0	2.36088	0.59	0.053	0	8	KLF4
0	2.35232	0.426	0.004	0	8	OLR1
0	2.33237	0.514	0.017	0	8	ITGAX
0	2.3264	0.887	0.369	0	8	SOD2
0	2.32225	0.584	0.037	0	8	CST3
0	2.28668	0.442	0.002	0	8	AQP9
0	2.21612	0.651	0.129	0	8	PLEK
0	2.20622	0.375	0.003	0	8	TNFAIP6
0	2.19825	0.436	0.005	0	8	CD14
0	2.19196	0.31	0.01	0	8	CXCL3
0	2.18709	0.401	0.003	0	8	SLC8A1
0	2.161	0.472	0.002	0	8	SERPINA1
0	2.14578	0.517	0.02	0	8	CD68
0	2.14415	0.499	0.053	0	8	VEGFA
0	2.12405	0.785	0.241	0	8	BCL2A1
0	2.11469	0.405	0.001	0	8	FCN1
0	2.09782	0.465	0.005	0	8	IGSF6
0	2.08314	0.807	0.248	0	8	TYMP
0	2.07918	0.457	0.022	0	8	EMILIN2
0	2.06123	0.365	0.002	0	8	CSF3R
0	2.04979	0.485	0.03	0	8	KYNU
0	2.04714	0.42	0.013	0	8	CCRL2
0	1.99359	0.397	0.023	0	8	CTSL
0	1.98707	0.452	0.059	0	8	LILRB1
0	1.97368	0.294	0.023	0	8	THBS1
0	1.96774	0.395	0.013	0	8	RP11-1143G9.4
0	1.94636	0.28	0.006	0	8	STAB1
0	1.91336	0.519	0.047	0	8	SPI1
0	1.91292	0.407	0.021	0	8	FNIP2
0	1.90078	0.411	0.024	0	8	EMR2
0	1.8958	0.387	0.029	0	8	ACSL1
0	1.89415	0.398	0.013	0	8	IRAK3
0	1.89074	0.352	0.012	0	8	NLRP3
0	1.88853	0.544	0.092	0	8	ICAM1
0	1.88228	0.595	0.116	0	8	PTPRE
0	1.8762	0.25	0.004	0	8	INHBA
0	1.85678	0.39	0.007	0	8	HCK
0	1.85449	0.405	0.023	0	8	MS4A7
0	1.83805	0.401	0.026	0	8	SLC43A2
0	1.83752	0.346	0.003	0	8	ANPEP
0	1.83563	0.348	0.005	0	8	CD93
0	1.81366	0.287	0.001	0	8	RP11-701P16.5
0	1.79055	0.328	0.003	0	8	C5AR1
0	1.77996	0.31	0.001	0	8	S100A12
0	1.77889	0.515	0.085	0	8	LST1
0	1.77475	0.439	0.058	0	8	DSE
0	1.76656	0.299	0.005	0	8	TLR4
0	1.75728	0.403	0.032	0	8	RBM47
0	1.75248	0.339	0.011	0	8	CFD
0	1.74527	0.39	0.029	0	8	CLEC7A
0	1.73429	0.352	0.002	0	8	CSTA
0	1.73208	0.377	0.011	0	8	NCF2
0	1.71869	0.342	0.001	0	8	RP11-290F20.3
0	1.71858	0.304	0.006	0	8	LUCAT1
0	1.7144	0.323	0.012	0	8	RASSF4
0	1.68186	0.32	0.001	0	8	CLEC4E
0	1.67278	0.273	0.012	0	8	ADM
0	1.66452	0.322	0.003	0	8	EPB41L3
0	1.65458	0.33	0.007	0	8	TGFBI
0	1.64838	0.338	0.024	0	8	KCTD12
0	1.64696	0.32	0.023	0	8	RNF144B
0	1.62246	0.253	0.006	0	8	SLC7A11
0	1.62098	0.255	0.004	0	8	THBD
0	1.61001	0.31	0.011	0	8	MCTP1
0	1.60672	0.304	0.021	0	8	HBEGF
0	1.60524	0.352	0.021	0	8	RAB31
0	1.60191	0.39	0.042	0	8	IFITM3
0	1.5959	0.296	0.001	0	8	FPR1
0	1.54381	0.336	0.027	0	8	DENND5A
0	1.53356	0.312	0.001	0	8	LILRA5
0	1.5145	0.307	0.003	0	8	LILRB4
0	1.50347	0.27	0.018	0	8	BEST1
0	1.47877	0.271	0.002	0	8	C19orf59
0	1.46983	0.313	0.017	0	8	FGR
0	1.46755	0.291	0.006	0	8	SPHK1
0	1.44574	0.278	0.006	0	8	MS4A6A
0	1.4299	0.289	0.004	0	8	PLXDC2
0	1.37586	0.277	0.003	0	8	TLR2
0	1.36246	0.293	0.004	0	8	PILRA
0	1.35585	0.304	0.017	0	8	CXCL16
0	1.34854	0.302	0.009	0	8	CFP
0	1.33676	0.26	0.002	0	8	CSF2RA
0	1.33317	0.283	0.004	0	8	CPVL
0	1.3201	0.251	0.003	0	8	PLA2G7
0	1.27856	0.251	0.006	0	8	CCR1
0	1.27588	0.255	0.012	0	8	SEMA6B
8.1927e-302	1.35696	0.993	0.766	1.61224e-297	8	SAT1
3.1552e-299	1.45394	0.253	0.017	6.20911e-295	8	MNDA
2.78721e-289	2.36083	0.632	0.162	5.48494e-285	8	TIMP1
1.18708e-287	1.20345	0.257	0.019	2.33605e-283	8	TFEC
3.46089e-286	1.4224	0.25	0.018	6.81068e-282	8	HMOX1
1.31109e-285	1.74308	0.274	0.022	2.58009e-281	8	CCL3L1
2.25507e-284	1.76624	0.429	0.061	4.43775e-280	8	ABCA1
3.00194e-279	1.85424	0.769	0.245	5.90751e-275	8	ZEB2
3.91241e-265	1.92405	0.541	0.112	7.69923e-261	8	GK
9.40777e-264	1.07378	0.986	0.831	1.85135e-259	8	NEAT1
6.1473e-262	-1.06345	0.654	0.961	1.20973e-257	8	RPS3
1.23325e-260	1.87734	0.789	0.332	2.42692e-256	8	CEBPB
3.01084e-258	1.67003	0.502	0.095	5.92503e-254	8	PLSCR1
5.95351e-258	1.74594	0.41	0.061	1.17159e-253	8	SLC16A3
8.85618e-255	1.01451	0.251	0.021	1.74281e-250	8	SLC15A3
3.60937e-252	2.00115	0.625	0.17	7.10288e-248	8	INSIG1
9.90435e-251	-1.08031	0.644	0.961	1.94908e-246	8	RPS4X
6.99684e-247	1.94796	0.528	0.114	1.37691e-242	8	SLC25A37
3.87912e-246	-2.50592	0.065	0.781	7.63372e-242	8	PTPRCAP
4.35054e-245	2.26076	0.405	0.065	8.56142e-241	8	SOX4
2.70212e-242	1.66181	0.433	0.071	5.3175e-238	8	CCDC88A
1.85019e-241	2.07263	0.397	0.064	3.641e-237	8	TNIP3
3.02758e-240	1.59579	0.427	0.071	5.95798e-236	8	PTPN12
1.29689e-236	-1.32293	0.515	0.92	2.55215e-232	8	RPSA
1.32224e-234	1.83648	0.524	0.116	2.60204e-230	8	DUSP6
3.36282e-233	1.71176	0.424	0.074	6.6177e-229	8	WARS
2.2336e-225	-1.12922	0.58	0.94	4.3955e-221	8	RPL5
9.52953e-218	1.63934	0.799	0.401	1.87532e-213	8	NAMPT
7.05475e-216	1.40351	0.411	0.072	1.3883e-211	8	GRINA
8.78766e-215	1.52983	0.404	0.069	1.72932e-210	8	IFI30
8.15413e-214	1.77379	0.753	0.287	1.60465e-209	8	LINC00936
6.71132e-207	1.39066	0.408	0.074	1.32072e-202	8	FCGRT
1.00854e-203	1.65799	0.659	0.235	1.98471e-199	8	PSAP
6.95721e-202	1.63206	0.505	0.121	1.36911e-197	8	UPP1
5.2975e-197	1.56007	0.343	0.056	1.04249e-192	8	ABL2
1.01872e-193	1.08568	0.278	0.036	2.00474e-189	8	GNS
1.17961e-193	1.68066	0.476	0.113	2.32135e-189	8	ZFYVE16
1.51885e-193	1.20415	0.299	0.041	2.98895e-189	8	ACTN1
1.1495e-192	1.42494	0.387	0.071	2.2621e-188	8	RIPK2
2.36152e-192	-1.05622	0.59	0.925	4.64723e-188	8	RPS5
2.23307e-190	-1.11531	0.554	0.92	4.39446e-186	8	EEF1B2
2.51619e-190	1.3896	0.442	0.093	4.95161e-186	8	GRN
1.17874e-188	1.11432	0.303	0.043	2.31964e-184	8	RNF130
6.91224e-187	1.65035	0.499	0.132	1.36026e-182	8	ATP13A3
5.0234e-186	1.62428	0.553	0.156	9.88554e-182	8	MARCKS
8.71729e-185	1.71734	0.583	0.182	1.71548e-180	8	MXD1
3.67912e-184	1.63258	0.446	0.105	7.24015e-180	8	NINJ1
1.05862e-182	1.3455	0.385	0.074	2.08325e-178	8	ATP6V1B2
1.47772e-182	1.7751	0.525	0.145	2.908e-178	8	SGK1
5.77469e-180	1.64465	0.457	0.106	1.1364e-175	8	NBPF10
2.2318e-177	-1.98943	0.196	0.755	4.39196e-173	8	CD69
5.10934e-177	1.2451	0.306	0.047	1.00547e-172	8	CORO1C
1.15726e-176	1.65641	0.532	0.15	2.27737e-172	8	TET2
2.30783e-176	-1.19713	0.478	0.878	4.54158e-172	8	TOMM7
6.1775e-174	1.48372	0.405	0.083	1.21567e-169	8	CEBPD
1.48613e-173	1.10461	0.271	0.037	2.92456e-169	8	ITGA5
9.3913e-172	1.76141	0.481	0.134	1.84811e-167	8	PPIF
1.04419e-168	-2.32521	0.079	0.659	2.05487e-164	8	LTB
7.16678e-167	1.33159	0.365	0.07	1.41035e-162	8	SH3BP2
4.4134e-162	1.38207	0.302	0.05	8.68513e-158	8	PHLDA2
2.83264e-161	1.3256	0.268	0.04	5.57435e-157	8	FGL2
4.28559e-160	1.42982	0.548	0.161	8.43361e-156	8	YBX3
5.28027e-158	-1.17838	0.468	0.848	1.0391e-153	8	RPS10
2.74437e-156	1.38511	0.506	0.139	5.40066e-152	8	LYN
5.70675e-154	1.42594	0.43	0.105	1.12303e-149	8	FNDC3B
1.46772e-150	-1.01757	0.521	0.881	2.88833e-146	8	COX7C
9.01808e-146	1.58147	0.606	0.223	1.77467e-141	8	CCL4
3.22549e-145	1.4429	0.683	0.363	6.34745e-141	8	S100A11
8.79881e-143	1.42084	0.475	0.136	1.73152e-138	8	METRNL
5.1953e-142	1.18495	0.315	0.061	1.02238e-137	8	FAM49A
6.70057e-140	-1.22619	0.387	0.781	1.31861e-135	8	HINT1
1.76904e-137	1.30876	0.417	0.108	3.4813e-133	8	CYBB
3.14698e-134	-2.30611	0.043	0.555	6.19295e-130	8	CD3D
9.49184e-131	-2.28498	0.036	0.542	1.8679e-126	8	CD2
2.39848e-130	-1.63348	0.169	0.641	4.71996e-126	8	STK17A
2.54018e-130	1.16447	0.339	0.075	4.99883e-126	8	PIK3AP1
2.52626e-129	-1.28418	0.349	0.736	4.97142e-125	8	TMEM66
2.58366e-129	1.28866	0.429	0.117	5.08439e-125	8	ARRB2
4.15451e-128	1.43037	0.599	0.241	8.17565e-124	8	BACH1
2.06977e-127	1.82037	0.501	0.174	4.07311e-123	8	MED29
1.38966e-126	-1.22847	0.345	0.754	2.73472e-122	8	GLTSCR2
1.94954e-126	1.38064	0.424	0.119	3.83649e-122	8	MAFF
9.81307e-124	1.32345	0.293	0.06	1.93111e-119	8	MIR22HG
1.13351e-123	-1.77271	0.081	0.57	2.23064e-119	8	ETS1
1.35149e-122	1.39565	0.734	0.409	2.6596e-118	8	RGS2
1.71694e-122	-1.16426	0.39	0.765	3.37877e-118	8	COMMD6
3.27434e-122	1.34724	0.571	0.217	6.44358e-118	8	ATF3
1.56289e-121	1.24146	0.638	0.294	3.07561e-117	8	EFHD2
1.09853e-118	1.31322	0.494	0.169	2.1618e-114	8	NUMB
2.70035e-117	1.1962	0.268	0.053	5.31402e-113	8	NAIP
1.72209e-116	1.13317	0.818	0.507	3.3889e-112	8	GADD45B
4.10503e-116	1.26559	0.403	0.115	8.07829e-112	8	CASP1
7.10977e-115	1.52415	0.253	0.05	1.39913e-110	8	EXT1
7.60343e-115	1.43991	0.326	0.078	1.49628e-110	8	ARHGAP26
1.58908e-114	-2.06726	0.069	0.529	3.12714e-110	8	IL32
2.76157e-114	-1.20233	0.342	0.742	5.4345e-110	8	CD52
5.73621e-114	1.3307	0.483	0.164	1.12883e-109	8	KLF10
4.8877e-113	1.28323	0.494	0.185	9.6185e-109	8	ANXA2
1.96851e-111	1.20775	0.303	0.07	3.87382e-107	8	RNF19B
2.27957e-111	1.12304	0.306	0.07	4.48596e-107	8	P2RX4
8.05162e-110	-1.24933	0.304	0.687	1.58448e-105	8	EIF3E
1.77267e-109	1.01963	0.255	0.05	3.48844e-105	8	TBXAS1
1.83529e-109	-1.47718	0.11	0.572	3.61166e-105	8	ACAP1
1.91962e-109	1.17813	0.28	0.061	3.77762e-105	8	SLC11A2
4.19729e-109	1.1948	0.306	0.071	8.25984e-105	8	ZSWIM6
5.5642e-109	1.50395	0.44	0.144	1.09498e-104	8	STX4
8.21048e-109	1.40666	0.589	0.288	1.61574e-104	8	SERPINB1
1.92098e-108	1.4076	0.333	0.086	3.7803e-104	8	DDX60L
1.69758e-107	1.66632	0.299	0.072	3.34067e-103	8	RPPH1
8.78643e-107	1.19722	0.326	0.083	1.72908e-102	8	SNX10
1.26134e-106	1.14847	0.374	0.104	2.48218e-102	8	IL6R
1.43807e-106	1.18868	0.4	0.123	2.82997e-102	8	BID
6.10672e-106	-1.93099	0.032	0.475	1.20174e-101	8	CD3E
1.2918e-105	1.39345	0.421	0.136	2.54213e-101	8	PFKFB3
2.11449e-105	1.24315	0.443	0.148	4.1611e-101	8	APLP2
2.18058e-105	-1.383	0.228	0.636	4.29116e-101	8	PPP2R5C
2.34174e-105	-1.13933	0.302	0.713	4.6083e-101	8	STK4
3.8486e-105	1.17202	0.625	0.301	7.57365e-101	8	LGALS1
5.97943e-105	1.22653	0.749	0.436	1.17669e-100	8	PPP1R15B
1.03605e-104	1.15825	0.698	0.348	2.03884e-100	8	CD83
4.72646e-104	1.29162	0.472	0.174	9.3012e-100	8	LGALS3
5.34327e-104	1.22941	0.289	0.066	1.0515e-99	8	SLCO3A1
7.95362e-104	1.02812	0.276	0.061	1.56519e-99	8	ZMIZ1
6.58339e-103	1.19565	0.304	0.074	1.29555e-98	8	C9orf72
1.0259e-102	1.30464	0.56	0.235	2.01886e-98	8	FOSL2
1.2349e-102	1.81816	0.264	0.061	2.43015e-98	8	PLK2
3.77338e-102	-1.88091	0.029	0.464	7.42564e-98	8	SYNE2
4.07251e-102	1.36907	0.449	0.154	8.01428e-98	8	RUNX1
1.18571e-100	1.24075	0.41	0.129	2.33337e-96	8	MYO1G
1.52199e-100	1.64726	0.456	0.167	2.99512e-96	8	CTA-29F11.1
1.71706e-100	1.257	0.596	0.284	3.379e-96	8	SPAG9
3.21452e-100	1.69814	0.427	0.153	6.32585e-96	8	IER5L
5.26773e-100	-1.3117	0.297	0.667	1.03664e-95	8	CD37
6.30299e-100	1.27097	0.283	0.067	1.24036e-95	8	GSAP
1.15539e-99	-1.97686	0.025	0.446	2.27369e-95	8	CD3G
6.21971e-99	1.00613	0.267	0.06	1.22398e-94	8	THEMIS2
8.13221e-99	1.25524	0.403	0.131	1.60034e-94	8	PDE4DIP
8.6018e-99	1.05146	0.254	0.055	1.69275e-94	8	TRIM25
3.19284e-98	1.46183	0.768	0.475	6.28319e-94	8	7SK.2
4.53622e-98	1.3834	0.473	0.175	8.92683e-94	8	LAP3
6.34758e-98	-1.37271	0.19	0.58	1.24914e-93	8	ANAPC16
5.79853e-96	1.26918	0.515	0.217	1.14109e-91	8	FLNA
1.23651e-95	1.0347	0.283	0.067	2.43333e-91	8	LAIR1
1.96489e-95	1.29274	0.3	0.077	3.8667e-91	8	RP6-99M1.2
1.22896e-94	1.20641	0.309	0.08	2.41847e-90	8	DPYD
1.51716e-94	1.11334	0.489	0.18	2.98561e-90	8	HLA-DRB5
2.01624e-94	1.14788	0.632	0.366	3.96775e-90	8	CTSS
2.34217e-94	-1.46336	0.134	0.53	4.60915e-90	8	LDHB
6.2049e-94	1.19128	0.716	0.397	1.22106e-89	8	ID2
1.05675e-93	1.22883	0.535	0.224	2.07958e-89	8	QKI
1.35638e-93	1.21376	0.534	0.244	2.66922e-89	8	CTSZ
2.28693e-93	1.23364	0.343	0.1	4.50044e-89	8	SCO2
1.24958e-91	1.80975	0.418	0.161	2.45904e-87	8	METTL12
1.85385e-91	1.24695	0.548	0.281	3.64818e-87	8	ANXA5
7.19668e-91	-1.13728	0.277	0.642	1.41623e-86	8	MZT2B
3.06749e-89	1.32543	0.473	0.192	6.03652e-85	8	EHD1
1.25756e-88	-1.58369	0.055	0.451	2.47475e-84	8	SLC38A1
1.55828e-88	1.27945	0.392	0.131	3.06654e-84	8	EHBP1L1
1.92874e-88	1.43799	0.395	0.134	3.79556e-84	8	HIST2H2AA3
3.10632e-88	-1.1439	0.267	0.647	6.11292e-84	8	CYTIP
5.93651e-88	1.13915	0.395	0.126	1.16825e-83	8	PHACTR1
8.02549e-88	1.03719	0.25	0.058	1.57934e-83	8	ARAP1
8.03003e-88	1.32862	0.626	0.335	1.58023e-83	8	EIF4A3
8.6372e-88	1.30164	0.45	0.168	1.69971e-83	8	PURB
8.71567e-87	1.11454	0.434	0.159	1.71516e-82	8	ASAH1
5.8268e-86	1.1255	0.505	0.207	1.14666e-81	8	BHLHE40
6.11115e-85	1.08732	0.271	0.069	1.20261e-80	8	HAVCR2
7.26356e-85	-1.51466	0.098	0.475	1.4294e-80	8	CNOT6L
2.84098e-84	1.15029	0.392	0.135	5.59077e-80	8	RHOQ
1.39772e-83	1.03433	0.325	0.096	2.75057e-79	8	STXBP2
5.43369e-82	-1.38726	0.131	0.503	1.0693e-77	8	EVL
2.98943e-81	1.16841	0.62	0.36	5.8829e-77	8	SOCS3
1.27116e-80	-1.64899	0.038	0.408	2.50152e-76	8	SPOCK2
4.31948e-80	1.17975	0.449	0.17	8.50031e-76	8	MYO9B
9.79729e-80	1.2744	0.398	0.15	1.92801e-75	8	C1orf122
3.19336e-79	-1.64656	0.038	0.409	6.28421e-75	8	RORA
4.27474e-79	1.26639	0.405	0.147	8.41226e-75	8	NDRG1
1.58887e-78	-1.2077	0.198	0.555	3.12674e-74	8	RHOH
3.17193e-78	-1.49233	0.071	0.438	6.24204e-74	8	FAM46C
2.50048e-76	1.17011	0.512	0.259	4.92069e-72	8	LITAF
2.75553e-76	-1.36532	0.111	0.459	5.42262e-72	8	PEBP1
3.10896e-76	-1.69365	0.039	0.39	6.11813e-72	8	CD7
1.26462e-75	1.42574	0.356	0.129	2.48864e-71	8	GBP1
1.16186e-74	-1.06911	0.281	0.599	2.28642e-70	8	ERP29
3.54112e-74	-1.3744	0.11	0.451	6.96856e-70	8	GYPC
1.17649e-73	1.09884	0.505	0.245	2.31522e-69	8	SERPINB9
7.91519e-73	1.19427	0.372	0.134	1.55763e-68	8	SLC7A5
1.03011e-71	-2.00901	0.029	0.368	2.02715e-67	8	KLRB1
2.12318e-71	-1.01108	0.214	0.559	4.1782e-67	8	CDC42SE2
3.06999e-71	1.27506	0.502	0.238	6.04144e-67	8	RN7SL1
3.57817e-71	1.30734	0.384	0.146	7.04149e-67	8	NXF1
1.99038e-70	1.09385	0.511	0.253	3.91686e-66	8	LCP2
3.86255e-70	1.11733	0.3	0.095	7.60111e-66	8	THAP2
9.74909e-69	1.33429	0.328	0.115	1.91852e-64	8	HES4
1.45972e-68	1.23863	0.401	0.168	2.87258e-64	8	PLIN2
4.83667e-68	-1.44069	0.013	0.336	9.51808e-64	8	OCIAD2
6.78241e-68	1.12156	0.313	0.106	1.33471e-63	8	BAG3
1.10697e-67	-1.32694	0.123	0.447	2.17841e-63	8	FYN
2.31997e-67	1.06265	0.27	0.081	4.56546e-63	8	ATP6V1C1
2.74403e-67	1.29245	0.47	0.224	5.39998e-63	8	SLC20A1
3.05646e-67	1.08186	0.561	0.307	6.01482e-63	8	NFKB1
6.34135e-67	-1.45215	0.023	0.347	1.24791e-62	8	LCK
7.17738e-67	1.02956	0.483	0.25	1.41244e-62	8	BRI3
8.6535e-67	1.09512	0.491	0.242	1.70292e-62	8	TNFRSF1B
9.03261e-67	1.1167	0.367	0.134	1.77753e-62	8	HSPA6
9.63396e-67	1.09556	0.274	0.083	1.89587e-62	8	NCOR2
1.17062e-65	-1.07361	0.257	0.581	2.30366e-61	8	ISG20
1.45045e-64	-1.04296	0.238	0.564	2.85435e-60	8	KIAA1551
3.6907e-64	-1.28497	0.133	0.452	7.26294e-60	8	RP11-138A9.2
7.58599e-64	-1.09535	0.156	0.483	1.49285e-59	8	2023-09-06
3.14694e-63	-1.01366	0.241	0.538	6.19287e-59	8	RSL24D1
6.52867e-63	-1.42984	0.01	0.316	1.28478e-58	8	SKAP1
8.34377e-63	-1.30933	0.128	0.431	1.64197e-58	8	LEPROTL1
2.29663e-62	1.06685	0.446	0.201	4.51954e-58	8	ELL2
3.73021e-62	-1.19305	0.183	0.485	7.34069e-58	8	BCAS2
3.84058e-62	-1.07809	0.188	0.495	7.55788e-58	8	AES
9.44897e-62	-1.22921	0.053	0.366	1.85946e-57	8	TSTD1
3.66719e-61	-1.42443	0.023	0.327	7.21666e-57	8	CD27
3.77966e-61	-1.45261	0.023	0.323	7.43799e-57	8	CLEC2D
4.32845e-61	1.5463	0.468	0.246	8.51796e-57	8	HEXIM1
2.43252e-60	1.44331	0.501	0.267	4.78696e-56	8	USP36
2.84802e-60	-1.24509	0.089	0.395	5.60461e-56	8	MZT2A
3.35987e-60	1.12622	0.319	0.114	6.61188e-56	8	RELT
1.32753e-59	-1.13201	0.216	0.509	2.61245e-55	8	SPCS1
7.75036e-59	1.22487	0.332	0.127	1.52519e-54	8	DNAJA4
1.2358e-58	1.06749	0.447	0.206	2.43193e-54	8	PNP
1.5567e-58	-1.12494	0.051	0.359	3.06342e-54	8	LBH
2.19471e-58	-1.41207	0.019	0.31	4.31896e-54	8	CD247
2.27757e-58	-1.47781	0.02	0.31	4.48203e-54	8	CCDC64
2.36016e-58	-1.06153	0.182	0.477	4.64456e-54	8	TERF2IP
6.06229e-57	1.02308	0.483	0.247	1.193e-52	8	GPCPD1
6.37312e-57	-1.20676	0.126	0.418	1.25417e-52	8	RARRES3
1.77505e-56	1.08905	0.369	0.15	3.49313e-52	8	TCIRG1
1.9085e-56	-1.43368	0.017	0.298	3.75575e-52	8	BCL11B
2.34181e-56	-1.40485	0.02	0.303	4.60844e-52	8	ITM2A
1.09921e-55	1.08033	0.264	0.087	2.16314e-51	8	DIAPH2
1.1947e-55	-1.29678	0.025	0.307	2.35105e-51	8	RP11-94L15.2
2.45587e-55	-1.11134	0.153	0.441	4.83292e-51	8	ICAM3
4.02321e-55	1.21093	0.341	0.137	7.91728e-51	8	RP3-395M20.12
4.25407e-55	1.30293	0.439	0.213	8.37158e-51	8	RHOB
4.9321e-55	-1.52137	0.02	0.298	9.70588e-51	8	ICOS
5.93252e-55	-1.10568	0.159	0.444	1.16746e-50	8	GTF3A
1.89872e-54	1.42627	0.434	0.228	3.7365e-50	8	ILF3-AS1
3.50316e-54	-1.13454	0.052	0.34	6.89387e-50	8	TBC1D10C
1.158e-53	-1.2732	0.058	0.344	2.27883e-49	8	PTPN22
2.15272e-53	1.26677	0.385	0.173	4.23634e-49	8	ITPR2
4.37936e-53	-1.26564	0.046	0.325	8.61815e-49	8	ODF2L
4.72265e-53	-1.16517	0.091	0.371	9.2937e-49	8	PRDX2
4.85725e-53	-1.04176	0.159	0.439	9.55859e-49	8	ISCU
2.65945e-52	-1.06045	0.098	0.384	5.23353e-48	8	EMB
4.71218e-52	-1.26635	0.04	0.313	9.27311e-48	8	SVIP
1.45273e-51	-1.27895	0.046	0.313	2.85883e-47	8	PBXIP1
1.52181e-50	1.11409	0.411	0.199	2.99477e-46	8	EIF4E
2.84582e-50	-1.42577	0.016	0.272	5.60029e-46	8	CD79B
2.89955e-50	1.07017	0.43	0.204	5.70603e-46	8	ERN1
3.36596e-50	-1.32717	0.046	0.308	6.62387e-46	8	IFITM1
3.4788e-50	1.02484	0.404	0.187	6.84593e-46	8	SAMHD1
1.37297e-49	-1.51137	0.029	0.288	2.70186e-45	8	CD79A
3.69344e-49	-1.04492	0.085	0.363	7.26833e-45	8	NDNL2
3.59057e-48	-1.24566	0.025	0.276	7.06588e-44	8	GLCCI1
7.33016e-47	-1.00664	0.215	0.453	1.4425e-42	8	SMDT1
1.17506e-46	1.11045	0.392	0.184	2.31239e-42	8	UBAC2
1.37207e-46	1.1825	0.271	0.105	2.70009e-42	8	SLFN11
1.47638e-46	-1.21633	0.016	0.258	2.90536e-42	8	FAIM3
2.24323e-46	-1.04407	0.101	0.361	4.41446e-42	8	TMEM243
6.96139e-46	1.0323	0.557	0.34	1.36993e-41	8	PARP14
1.05075e-45	-1.27142	0.026	0.268	2.06778e-41	8	TCF7
3.76484e-45	-1.10002	0.081	0.331	7.40884e-41	8	PSIP1
7.70211e-45	-1.20054	0.02	0.257	1.5157e-40	8	P2RY10
8.81326e-45	-1.27019	0.059	0.31	1.73436e-40	8	GIMAP7
1.90138e-44	-1.02658	0.088	0.34	3.74173e-40	8	ARHGAP15
3.96703e-44	-1.1091	0.027	0.268	7.80672e-40	8	RASGRP1
2.82652e-43	-1.00034	0.255	0.474	5.56231e-39	8	TMEM59
3.40476e-43	-1.24053	0.042	0.282	6.70023e-39	8	RALGPS2
2.23842e-42	-1.01921	0.104	0.342	4.40498e-38	8	POLR2K
2.53868e-42	-1.47219	0.058	0.293	4.99586e-38	8	FKBP11
3.85497e-42	-1.06273	0.076	0.324	7.5862e-38	8	ANKRD36
5.47292e-42	1.0604	0.276	0.113	1.07702e-37	8	ABHD5
8.0604e-42	-1.05627	0.079	0.322	1.58621e-37	8	TRAF3IP3
6.47503e-40	-1.05769	0.039	0.261	1.27422e-35	8	SP140
4.86977e-39	-1.22626	0.143	0.369	9.58322e-35	8	SEC11C
6.81393e-39	-1.10641	0.035	0.252	1.34091e-34	8	TPD52
1.30172e-38	-1.00522	0.033	0.252	2.56165e-34	8	2023-09-01
4.86712e-38	1.25032	0.276	0.124	9.57801e-34	8	RP5-821D11.7
1.44837e-36	-1.05169	0.052	0.266	2.85024e-32	8	TP53INP1
1.83641e-36	-1.04443	0.049	0.258	3.61387e-32	8	RCAN3
2.9527e-35	1.19886	0.417	0.242	5.81062e-31	8	WDR74
7.43615e-34	1.14738	0.304	0.15	1.46336e-29	8	GADD45G
4.53978e-31	1.13484	0.375	0.219	8.93383e-27	8	RP11-796E2.4
1.95257e-30	1.09394	0.284	0.144	3.84245e-26	8	SEPHS2
9.42421e-29	-1.05321	0.111	0.289	1.85459e-24	8	LMAN1
2.25693e-23	1.02146	0.434	0.294	4.44141e-19	8	INTS6
6.00157e-23	1.12859	0.309	0.189	1.18105e-18	8	RP1-313I6.12
3.59617e-17	1.08105	0.273	0.172	7.0769e-13	8	HIST1H2AC
0	3.33392	0.864	0.062	0	9	GNLY
0	2.7154	0.775	0.067	0	9	GZMB
0	2.66836	0.917	0.13	0	9	NKG7
0	2.60436	0.83	0.051	0	9	KLRD1
0	2.35214	0.484	0.002	0	9	FGFBP2
0	2.26272	0.469	0.033	0	9	XCL2
0	2.2554	0.549	0.047	0	9	GZMH
0	2.24811	0.632	0.059	0	9	PRF1
0	2.23866	0.752	0.076	0	9	CTSW
0	2.15569	0.473	0.011	0	9	FCGR3A
0	2.08188	0.366	0.017	0	9	XCL1
0	2.05763	0.453	0.004	0	9	KLRF1
0	1.99592	0.692	0.095	0	9	HOPX
0	1.97647	0.632	0.054	0	9	TYROBP
0	1.93454	0.368	0.014	0	9	KLRC1
0	1.76984	0.589	0.075	0	9	SAMD3
0	1.49651	0.342	0.016	0	9	C1orf21
0	1.39975	0.259	0.008	0	9	KLRC2
2.92537e-292	1.94836	0.828	0.184	5.75684e-288	9	CST7
1.38827e-288	1.99296	0.752	0.142	2.73197e-284	9	GZMA
4.73301e-282	1.57894	0.462	0.05	9.31409e-278	9	MATK
2.43626e-270	1.62084	0.442	0.045	4.79431e-266	9	FCER1G
1.15067e-219	1.81756	0.83	0.226	2.2644e-215	9	CCL5
3.17887e-206	1.50596	0.346	0.038	6.2557e-202	9	CLIC3
1.46518e-182	1.92471	0.759	0.225	2.88332e-178	9	CCL4
1.86259e-151	1.68029	0.562	0.131	3.6654e-147	9	IFNG
1.93849e-149	1.45109	0.333	0.049	3.81475e-145	9	SPON2
2.81557e-147	1.85665	0.549	0.132	5.54077e-143	9	CCL3
3.33514e-144	1.16415	0.266	0.032	6.56323e-140	9	TGFBR3
1.54652e-139	1.26686	0.31	0.045	3.04339e-135	9	TBX21
7.42699e-129	1.1362	0.884	0.47	1.46156e-124	9	IFITM2
1.2378e-121	1.11394	0.893	0.467	2.43586e-117	9	HCST
6.25135e-116	1.31296	0.592	0.193	1.2302e-111	9	APOBEC3G
1.31289e-114	1.31578	0.533	0.153	2.58363e-110	9	IL2RB
4.78974e-109	1.07869	0.263	0.041	9.42573e-105	9	CD300A
4.3348e-102	1.19546	0.395	0.091	8.53046e-98	9	TXK
5.28479e-102	1.27074	0.496	0.141	1.03999e-97	9	METRNL
1.72013e-99	1.18868	0.679	0.257	3.38504e-95	9	ZEB2
2.94073e-98	1.23534	0.357	0.079	5.78706e-94	9	MYBL1
3.29863e-90	1.14108	0.672	0.286	6.49138e-86	9	CD247
1.03663e-88	1.1148	0.676	0.298	2.03999e-84	9	EFHD2
3.80941e-88	1.16742	0.417	0.115	7.49654e-84	9	C12orf75
7.23893e-88	1.10724	0.685	0.285	1.42455e-83	9	IFITM1
8.25701e-87	1.11773	0.321	0.071	1.6249e-82	9	HAVCR2
5.85334e-77	1.01058	0.364	0.097	1.15188e-72	9	APMAP
8.16464e-76	1.08412	0.576	0.228	1.60672e-71	9	GZMM
1.57325e-74	1.05393	0.453	0.144	3.09601e-70	9	PLEK
1.85004e-66	1.22997	0.446	0.165	3.64069e-62	9	CMC1
1.6256e-64	1.05807	0.522	0.212	3.19902e-60	9	BHLHE40
6.50387e-60	1.03401	0.382	0.126	1.2799e-55	9	MAFF
2.60842e-57	-1.2232	0.279	0.643	5.13311e-53	9	LTB
4.41756e-35	-1.60063	0.016	0.284	8.69331e-31	9	CD79A
1.8091e-34	-1.02937	0.246	0.529	3.56014e-30	9	GPR183
1.0831e-31	-1.46835	0.029	0.279	2.13143e-27	9	RALGPS2
2.13305e-31	-1.21101	0.058	0.321	4.19762e-27	9	CD27
6.12312e-30	-1.46619	0.04	0.282	1.20497e-25	9	MEF2C
3.3063e-28	-1.13311	0.1	0.343	6.50647e-24	9	NCF1
2.85252e-26	-1.11734	0.076	0.309	5.61347e-22	9	POU2F2
2.74431e-21	-1.47072	0.194	0.375	5.40053e-17	9	HLA-DRA
3.49449e-20	-1.297	0.074	0.254	6.87681e-16	9	HLA-DQA1
8.04854e-20	-1.07529	0.163	0.349	1.58387e-15	9	HLA-DQB1
2.75949e-16	-1.46507	0.181	0.346	5.4304e-12	9	IGJ
1.2278e-15	-1.11096	0.382	0.531	2.41618e-11	9	IGLL5
0	2.15345	0.96	0.207	0	10	MS4A1
6.42971e-299	1.98189	0.535	0.064	1.2653e-294	10	RP11-693J15.5
2.20063e-294	2.03169	0.843	0.181	4.33063e-290	10	BANK1
3.61428e-291	2.05258	0.723	0.13	7.11254e-287	10	CD22
9.26069e-254	1.90927	0.477	0.058	1.82241e-249	10	TCL1A
9.21272e-232	1.90512	0.533	0.083	1.81297e-227	10	FCRL1
1.52668e-223	1.79991	0.869	0.258	3.00435e-219	10	MEF2C
4.78392e-222	1.73173	0.446	0.058	9.41428e-218	10	FCER2
2.46158e-219	1.81219	0.822	0.245	4.84414e-215	10	CD79B
1.06993e-213	1.79551	0.519	0.085	2.10552e-209	10	2023-03-01
3.15544e-212	1.64633	0.953	0.353	6.20959e-208	10	HLA-DPB1
1.19342e-194	1.73711	0.676	0.152	2.34852e-190	10	VPREB3
7.74199e-192	1.37422	0.988	0.577	1.52355e-187	10	CD74
1.88579e-187	1.59838	0.969	0.352	3.71104e-183	10	HLA-DRA
7.61831e-180	1.6818	0.465	0.079	1.49921e-175	10	CD72
1.35858e-173	1.67429	0.505	0.095	2.67354e-169	10	LINC00926
1.14945e-170	1.66746	0.603	0.142	2.26201e-166	10	HLA-DMB
4.21004e-169	1.482	0.908	0.358	8.28494e-165	10	HLA-DPA1
1.04529e-167	1.73206	0.542	0.117	2.05703e-163	10	AFF3
2.21286e-164	1.44731	0.923	0.378	4.35469e-160	10	HLA-DRB1
6.17961e-161	1.56366	0.777	0.257	1.21608e-156	10	RALGPS2
2.82119e-158	1.56742	0.392	0.063	5.55181e-154	10	GAPT
4.70829e-157	1.6616	0.582	0.145	9.26545e-153	10	STX7
9.39656e-156	1.64947	0.474	0.094	1.84915e-151	10	BCL11A
2.48094e-154	1.60426	0.477	0.096	4.88223e-150	10	HVCN1
7.87386e-151	1.50113	0.39	0.065	1.5495e-146	10	TLR10
2.49141e-145	1.56683	0.556	0.136	4.90285e-141	10	ADAM28
7.41667e-144	-2.6016	0.085	0.764	1.45953e-139	10	SRGN
7.06911e-143	1.69293	0.425	0.081	1.39113e-138	10	HLA-DQA2
3.75805e-139	1.2778	0.261	0.031	7.39546e-135	10	COL19A1
8.24533e-139	1.52485	0.467	0.101	1.6226e-134	10	LY86
6.59e-138	1.35045	0.85	0.329	1.29685e-133	10	HLA-DQB1
1.23043e-134	1.05709	0.932	0.642	2.42137e-130	10	CD37
3.88583e-134	1.35592	0.761	0.262	7.64692e-130	10	CD79A
1.72145e-131	1.48194	0.425	0.087	3.38765e-127	10	CD19
3.70414e-131	1.39558	0.739	0.234	7.28938e-127	10	HLA-DQA1
7.43079e-125	1.50609	0.519	0.139	1.4623e-120	10	PLEKHF2
3.14205e-120	1.34953	0.315	0.051	6.18323e-116	10	FAM129C
3.22266e-119	1.3513	0.754	0.324	6.34188e-115	10	NCF1
4.28965e-111	1.38745	0.406	0.09	8.44161e-107	10	PAX5
5.14556e-110	1.29982	0.31	0.054	1.0126e-105	10	CIITA
2.17552e-109	1.38857	0.453	0.113	4.2812e-105	10	CYBB
9.61358e-107	1.49706	0.57	0.193	1.89186e-102	10	SNX29P2
4.08842e-106	1.41645	0.566	0.177	8.0456e-102	10	SMIM14
2.495e-103	1.30547	0.315	0.059	4.90991e-99	10	CR2
3.35995e-98	-1.29838	0.401	0.85	6.61204e-94	10	KLF6
1.14565e-96	1.38744	0.556	0.183	2.25453e-92	10	HLA-DRB5
9.33189e-95	1.27695	0.613	0.23	1.83642e-90	10	HLA-DMA
5.52102e-92	1.31152	0.364	0.086	1.08648e-87	10	BLK
9.60964e-91	-2.59376	0.007	0.547	1.89108e-86	10	CD3D
1.65331e-89	-2.11923	0.129	0.639	3.25355e-85	10	TNFAIP3
4.42493e-88	1.26095	0.657	0.292	8.70782e-84	10	POU2F2
1.75899e-86	-2.48725	0.007	0.533	3.46151e-82	10	CD2
1.45471e-85	-2.16997	0.059	0.577	2.86272e-81	10	NR4A2
1.23715e-83	1.28733	0.427	0.125	2.43458e-79	10	LYL1
1.9055e-83	-1.08326	0.528	0.863	3.74982e-79	10	JUNB
2.39804e-82	1.25038	0.364	0.093	4.7191e-78	10	BTK
2.77103e-82	-2.47061	0.014	0.522	5.4531e-78	10	IL32
4.40385e-81	-1.19122	0.378	0.834	8.66634e-77	10	FOSB
1.421e-80	1.29364	0.46	0.147	2.79638e-76	10	SWAP70
1.89139e-79	-1.96766	0.122	0.61	3.72207e-75	10	RGS1
5.22558e-76	1.19789	0.27	0.057	1.02834e-71	10	HHEX
8.84931e-76	1.16601	0.667	0.341	1.74146e-71	10	PARP14
1.76323e-75	-1.94493	0.117	0.585	3.46985e-71	10	S100A4
2.61896e-73	1.16546	0.531	0.195	5.15385e-69	10	BASP1
7.63316e-73	-1.07391	0.448	0.838	1.50213e-68	10	DUSP1
1.79624e-71	-1.32617	0.319	0.735	3.53482e-67	10	NFKBIA
3.09948e-71	1.17242	0.293	0.069	6.09947e-67	10	FGD2
5.31042e-71	1.25194	0.319	0.082	1.04504e-66	10	FCRL2
2.31019e-70	-2.16335	0.005	0.464	4.54623e-66	10	FYB
7.1556e-70	1.21445	0.415	0.132	1.40815e-65	10	CD40
1.35194e-69	-2.05981	0.012	0.468	2.66049e-65	10	CD3E
1.90785e-69	1.25183	0.357	0.101	3.75446e-65	10	ARHGAP24
1.0993e-67	1.16076	0.408	0.131	2.16332e-63	10	TNFRSF13C
2.99936e-67	1.11117	0.258	0.057	5.90244e-63	10	CR1
5.99758e-67	-1.42755	0.2	0.643	1.18026e-62	10	CYCS
5.21313e-66	1.12683	0.376	0.115	1.02589e-61	10	BLNK
2.81539e-65	1.24414	0.397	0.13	5.54041e-61	10	P2RX5
3.23132e-65	-2.08927	0.005	0.439	6.35891e-61	10	CD3G
2.96931e-64	1.09438	0.305	0.08	5.8433e-60	10	PAWR
1.52219e-63	1.19124	0.319	0.088	2.99552e-59	10	FAM26F
1.60402e-63	-1.73871	0.108	0.539	3.15655e-59	10	CREM
2.71361e-63	-2.43958	0.005	0.432	5.34011e-59	10	IL7R
1.26619e-62	-1.40671	0.19	0.627	2.49174e-58	10	SELK
8.3421e-61	1.18593	0.359	0.116	1.64164e-56	10	RABEP2
3.26602e-60	-1.1167	0.369	0.735	6.42721e-56	10	VIM
1.14323e-59	1.19894	0.427	0.16	2.24977e-55	10	PARP15
1.41136e-59	-1.1189	0.343	0.723	2.77741e-55	10	MCL1
2.60126e-59	1.09149	0.315	0.09	5.11902e-55	10	CTA-250D10.23
4.49616e-59	-1.16296	0.322	0.724	8.84798e-55	10	ZFP36
2.12919e-58	1.1177	0.455	0.175	4.19003e-54	10	TCF4
4.88392e-57	1.07061	0.324	0.096	9.61107e-53	10	PKIG
3.14609e-56	1.04401	0.263	0.068	6.19119e-52	10	HLA-DOB
3.94638e-56	1.06639	0.566	0.287	7.76607e-52	10	RCSD1
5.02049e-56	1.15557	0.493	0.218	9.87983e-52	10	ZCCHC7
7.71557e-56	1.11705	0.514	0.23	1.51835e-51	10	PLAC8
8.06052e-56	-1.28901	0.23	0.635	1.58623e-51	10	HSPH1
8.67328e-56	1.05024	0.272	0.072	1.70681e-51	10	SPIB
1.20927e-55	-1.86146	0.063	0.458	2.37972e-51	10	RGCC
2.49574e-55	-1.57889	0.143	0.541	4.91136e-51	10	DUSP2
2.43876e-54	-1.81454	0.002	0.385	4.79924e-50	10	AAK1
2.46996e-54	1.10398	0.418	0.162	4.86063e-50	10	FCHSD2
2.56305e-54	1.0902	0.31	0.095	5.04383e-50	10	CEPT1
2.70894e-54	-1.53313	0.11	0.516	5.33091e-50	10	NR4A1
4.2033e-54	1.09773	0.371	0.129	8.27167e-50	10	LAT2
4.69559e-54	-1.27708	0.221	0.614	9.24045e-50	10	S100A6
2.93526e-53	-1.88314	0.019	0.403	5.77631e-49	10	RORA
5.19714e-53	-1.83438	0.007	0.385	1.02275e-48	10	CD7
5.50377e-53	-1.90942	0.04	0.422	1.08309e-48	10	ID2
2.09988e-52	-1.15814	0.261	0.646	4.13236e-48	10	DNAJB6
7.33083e-51	-1.55226	0.101	0.483	1.44263e-46	10	ZNF331
2.75805e-50	1.10052	0.448	0.195	5.42756e-46	10	GGA2
3.81452e-50	1.03485	0.378	0.132	7.5066e-46	10	PHACTR1
5.45893e-50	1.11227	0.408	0.164	1.07426e-45	10	STRBP
8.36935e-49	-1.44474	0.122	0.49	1.647e-44	10	HCST
2.18333e-48	-1.4822	0.085	0.458	4.29658e-44	10	KDM6B
1.07902e-47	1.06607	0.364	0.138	2.12339e-43	10	SNX29
1.60563e-47	1.03309	0.336	0.118	3.15971e-43	10	CYB561A3
3.66816e-47	-1.32277	0.167	0.531	7.21858e-43	10	GPR183
8.74328e-47	-1.29671	0.131	0.515	1.72059e-42	10	AHNAK
1.01627e-46	-2.13622	0.019	0.362	1.99991e-42	10	KLRB1
2.94588e-46	1.01226	0.272	0.083	5.7972e-42	10	SYK
7.52301e-45	-1.52465	0.035	0.381	1.48045e-40	10	SOCS3
1.08736e-44	-1.39721	0.089	0.443	2.13982e-40	10	FYN
8.93496e-44	-1.50886	0.087	0.434	1.75831e-39	10	RGS2
2.30044e-43	1.06042	0.254	0.076	4.52704e-39	10	MTSS1
3.5067e-43	-1.37162	0.08	0.431	6.90084e-39	10	MYADM
4.05885e-43	-1.36839	0.082	0.427	7.9874e-39	10	LEPROTL1
4.55375e-43	-1.63583	0.031	0.361	8.96132e-39	10	LINC00152
3.75709e-41	1.04355	0.38	0.161	7.39358e-37	10	TMEM154
8.64651e-41	-1.35324	0.127	0.456	1.70155e-36	10	SAMSN1
4.15528e-40	-1.71866	0.009	0.317	8.17718e-36	10	MAF
3.54678e-39	1.04337	0.268	0.089	6.97971e-35	10	STAG3
4.53377e-39	-1.32125	0.099	0.428	8.92201e-35	10	NAMPT
8.78391e-39	-1.02863	0.214	0.552	1.72859e-34	10	LDHA
1.93708e-38	-1.67187	0.012	0.307	3.81199e-34	10	GIMAP7
6.21547e-38	-1.51935	0.002	0.293	1.22314e-33	10	BCL11B
6.91628e-38	-1.50455	0.009	0.306	1.36106e-33	10	CCDC64
7.21841e-38	-1.30591	0.082	0.4	1.42051e-33	10	SPOCK2
1.64648e-37	-1.63881	0.005	0.294	3.2401e-33	10	ICOS
2.7197e-37	-1.17724	0.12	0.446	5.3521e-33	10	RP11-138A9.2
3.31748e-37	-1.06372	0.23	0.557	6.52846e-33	10	SLC2A3
1.50606e-36	-1.42837	0.016	0.305	2.96377e-32	10	CD247
4.82315e-36	-1.1182	0.192	0.504	9.49147e-32	10	ARL4C
4.97423e-36	-1.14346	0.136	0.459	9.78878e-32	10	PPP1R15B
2.89084e-35	-1.09635	0.164	0.48	5.68889e-31	10	BCAS2
5.19242e-35	-1.32386	0.082	0.386	1.02182e-30	10	S100A11
1.1713e-34	-1.86664	0.019	0.293	2.305e-30	10	ANXA1
1.35352e-34	-1.04174	0.239	0.555	2.66359e-30	10	VMP1
2.9086e-34	-1.15421	0.113	0.427	5.72384e-30	10	UBE2S
1.13807e-33	-1.49898	0.014	0.284	2.2396e-29	10	PRDM1
1.66672e-33	-1.12314	0.117	0.424	3.27995e-29	10	SDCBP
1.70757e-33	-1.06178	0.138	0.455	3.36033e-29	10	TUBB4B
1.0052e-32	-1.21274	0.066	0.353	1.97814e-28	10	RP11-489E7.4
1.0918e-32	-1.37071	0.005	0.263	2.14856e-28	10	SYTL3
1.72957e-32	-1.47656	0.04	0.309	3.40361e-28	10	LMNA
1.92968e-32	-1.25346	0.049	0.331	3.79742e-28	10	CKS2
5.11052e-32	-1.11727	0.103	0.402	1.0057e-27	10	TXN
6.54725e-32	-1.11032	0.113	0.409	1.28843e-27	10	NABP1
8.65122e-32	-1.30967	0.063	0.34	1.70247e-27	10	PTGER4
9.32439e-32	-1.43485	0.005	0.257	1.83495e-27	10	FOSL2
4.20206e-31	-1.42449	0.007	0.255	8.26923e-27	10	GIMAP4
5.53475e-31	-1.16458	0.07	0.351	1.08918e-26	10	LIMS1
7.64174e-31	-1.20634	0.068	0.342	1.50382e-26	10	CTSC
8.69231e-31	-1.3326	0.042	0.305	1.71056e-26	10	GADD45A
1.83095e-30	-1.15463	0.073	0.352	3.60313e-26	10	TIPARP
1.83119e-30	-1.04074	0.134	0.43	3.60361e-26	10	FAM46C
2.32692e-30	-1.07757	0.124	0.411	4.57915e-26	10	CD97
2.62103e-30	-1.18357	0.023	0.278	5.15793e-26	10	ATXN1
3.99452e-30	-1.30201	0.014	0.261	7.86082e-26	10	GPRIN3
7.96249e-30	-1.27395	0.023	0.275	1.56694e-25	10	DUSP5
1.01947e-29	-1.40229	0.124	0.399	2.00622e-25	10	XBP1
5.86086e-29	-1.23312	0.019	0.264	1.15336e-24	10	TCF7
7.14941e-29	-1.21085	0.026	0.271	1.40693e-24	10	LCP2
1.1254e-28	-1.1687	0.085	0.356	2.21468e-24	10	CITED2
1.29963e-28	-1.06704	0.07	0.336	2.55754e-24	10	DEDD2
1.30639e-28	-1.02043	0.101	0.376	2.57085e-24	10	IRF2BP2
1.51003e-28	-1.19228	0.045	0.297	2.97159e-24	10	ITM2A
1.52699e-28	-1.09601	0.049	0.305	3.00496e-24	10	CSRNP1
1.75337e-28	-1.35939	0.066	0.323	3.45046e-24	10	LGALS1
1.77877e-28	-1.24701	0.035	0.283	3.50044e-24	10	AHR
8.07524e-28	-1.09094	0.033	0.276	1.58913e-23	10	PER1
2.25877e-27	-1.31022	0.035	0.276	4.44503e-23	10	PHLDA1
5.48017e-27	-1.02161	0.089	0.346	1.07844e-22	10	FAM177A1
8.19353e-27	-1.17245	0.061	0.304	1.6124e-22	10	MT2A
3.02582e-26	-1.01923	0.087	0.339	5.95451e-22	10	LCK
8.64198e-26	-1.13765	0.049	0.284	1.70066e-21	10	SLFN5
8.65736e-26	-1.75936	0.031	0.25	1.70368e-21	10	CCL5
1.5165e-25	-1.07824	0.031	0.257	2.98432e-21	10	JMY
2.24973e-24	-1.06914	0.042	0.265	4.42725e-20	10	CORO1B
2.09846e-23	-1.04955	0.04	0.257	4.12957e-19	10	PLK3
1.27619e-21	-1.09124	0.085	0.298	2.51141e-17	10	ANKRD28
9.76184e-20	-1.01954	0.08	0.287	1.92103e-15	10	EGR1
3.01292e-18	-1.21789	0.099	0.287	5.92913e-14	10	FKBP11
7.22278e-17	-1.00558	0.153	0.345	1.42137e-12	10	FKBP2
2.3621e-07	-1.06453	0.23	0.344	0.00464838	10	IGJ
0	3.34356	0.993	0.209	0	11	MZB1
0	3.32967	0.896	0.122	0	11	DERL3
0	3.31003	0.861	0.139	0	11	PRDX4
0	3.27275	0.609	0.054	0	11	RP11-731F5.2
0	3.04546	0.932	0.264	0	11	FKBP11
0	2.75649	0.936	0.323	0	11	FKBP2
5.61992e-298	2.74816	0.929	0.342	1.10594e-293	11	SEC11C
1.7307e-275	2.55688	0.939	0.376	3.40584e-271	11	XBP1
3.46833e-275	2.48875	0.998	0.671	6.82532e-271	11	SSR4
1.44446e-249	2.88236	0.889	0.325	2.84256e-245	11	IGJ
1.5178e-248	2.53519	0.873	0.345	2.98689e-244	11	SSR3
3.03203e-246	1.25389	0.995	0.937	5.96674e-242	11	FTL
8.04003e-237	2.60218	0.522	0.083	1.5822e-232	11	TNFRSF17
9.68411e-236	1.62594	0.972	0.837	1.90574e-231	11	CYBA
3.8896e-234	2.06048	0.951	0.598	7.65435e-230	11	HSP90B1
1.42633e-211	2.16583	0.899	0.526	2.80688e-207	11	SPCS2
5.87161e-211	1.22522	0.958	0.925	1.15547e-206	11	HLA-C
2.84133e-198	-1.23147	0.682	0.996	5.59145e-194	11	MALAT1
5.66502e-194	2.48957	0.729	0.25	1.11482e-189	11	SDF2L1
2.58931e-191	2.49112	0.696	0.222	5.0955e-187	11	SELM
1.01011e-190	1.04538	0.946	0.911	1.98779e-186	11	RPLP0
5.41425e-186	1.90212	0.882	0.587	1.06547e-181	11	SEC61B
1.47018e-180	2.52908	0.692	0.234	2.89316e-176	11	MANF
2.5836e-180	2.10435	0.845	0.486	5.08426e-176	11	SPCS1
3.24712e-180	2.2029	0.833	0.454	6.39e-176	11	TMEM59
2.01999e-171	2.50449	0.654	0.208	3.97513e-167	11	ERLEC1
2.45225e-170	2.22784	0.779	0.361	4.82579e-166	11	CD63
7.21091e-168	2.65406	0.866	0.517	1.41903e-163	11	IGLL5
2.23237e-164	1.00685	0.911	0.894	4.39308e-160	11	RPL36AL
2.53546e-164	1.07469	0.908	0.9	4.98954e-160	11	SERF2
1.51567e-163	-2.45299	0.047	0.833	2.9827e-159	11	CCNL1
9.29112e-161	2.12595	0.798	0.431	1.8284e-156	11	SPCS3
1.67512e-159	1.49304	0.875	0.735	3.29647e-155	11	SUB1
4.82262e-159	2.13498	0.734	0.303	9.49044e-155	11	LGALS1
1.36539e-154	-1.97687	0.167	0.929	2.68695e-150	11	BTG1
2.14645e-153	-2.26781	0.085	0.85	4.22399e-149	11	PPP1R15A
3.60752e-152	-2.2992	0.096	0.859	7.09924e-148	11	KLF6
1.3031e-151	2.1398	0.765	0.399	2.56437e-147	11	RABAC1
2.12118e-150	2.40671	0.579	0.172	4.17428e-146	11	ITM2C
8.85532e-150	-2.16901	0.115	0.875	1.74264e-145	11	JUNB
1.99952e-147	1.8666	0.821	0.574	3.93486e-143	11	PPIB
1.70853e-146	2.28076	0.322	0.047	3.36222e-142	11	JSRP1
1.7908e-146	2.20888	0.36	0.059	3.52412e-142	11	SDC1
4.40732e-138	2.27798	0.664	0.27	8.67316e-134	11	LMAN1
3.7312e-136	-2.4514	0.04	0.744	7.34263e-132	11	CD52
1.17863e-135	1.69382	0.819	0.536	2.31942e-131	11	HERPUD1
3.77379e-135	-1.8438	0.134	0.875	7.42644e-131	11	SRSF7
1.16947e-133	-2.39003	0.033	0.737	2.30139e-129	11	ZFP36L1
3.13289e-133	-2.15045	0.049	0.76	6.16522e-129	11	TRA2B
3.57039e-133	1.70004	0.814	0.622	7.02617e-129	11	TMBIM6
2.03802e-129	-2.00468	0.061	0.768	4.01063e-125	11	ARGLU1
2.69322e-129	-1.84994	0.12	0.847	5.29999e-125	11	PTPRC
2.93729e-129	-1.894	0.125	0.848	5.78028e-125	11	DUSP1
3.57391e-129	2.18152	0.689	0.331	7.0331e-125	11	PDIA6
6.11565e-129	2.22355	0.285	0.041	1.2035e-124	11	PTP4A3
6.51352e-128	1.39685	0.831	0.722	1.28179e-123	11	SERP1
4.01117e-127	-2.07401	0.056	0.752	7.89359e-123	11	PNISR
2.88504e-126	-1.98689	0.054	0.75	5.67747e-122	11	C1orf63
3.45817e-125	-2.03023	0.066	0.753	6.80533e-121	11	GPBP1
4.47745e-125	2.30496	0.612	0.239	8.81117e-121	11	RPN2
1.24877e-124	-1.88929	0.082	0.781	2.45746e-120	11	FUS
1.77853e-124	2.27527	0.372	0.075	3.49997e-120	11	CADM1
1.80777e-123	2.25401	0.633	0.267	3.55751e-119	11	C19orf10
3.2913e-122	2.11131	0.659	0.295	6.47695e-118	11	VIMP
8.83767e-121	2.09735	0.32	0.056	1.73917e-116	11	GAS6
4.88489e-120	-2.677	0.005	0.653	9.61297e-116	11	REL
2.60157e-119	-2.18639	0.075	0.748	5.11963e-115	11	CD69
6.33889e-119	-2.07612	0.064	0.732	1.24743e-114	11	ZFP36L2
5.72377e-118	-1.90391	0.078	0.759	1.12638e-113	11	ZFAS1
3.02669e-117	2.17333	0.548	0.187	5.95623e-113	11	PPAPDC1B
4.42249e-117	1.85465	0.741	0.477	8.70301e-113	11	SEC61G
6.81538e-117	1.8322	0.748	0.495	1.3412e-112	11	TMEM258
5.5616e-116	1.28729	0.816	0.765	1.09447e-111	11	OST4
2.74298e-115	-1.85445	0.141	0.81	5.39791e-111	11	DNAJB1
2.86648e-113	2.20591	0.532	0.181	5.64095e-109	11	CRELD2
3.17034e-113	-2.55491	0.016	0.65	6.23892e-109	11	LTB
7.4515e-113	-1.56553	0.247	0.912	1.46638e-108	11	JUN
2.15625e-112	-1.30812	0.372	0.971	4.24328e-108	11	JUND
1.19691e-109	-1.93411	0.089	0.742	2.3554e-105	11	NFKBIA
1.12259e-107	-1.40398	0.181	0.89	2.20915e-103	11	RBM39
5.05908e-106	-1.87469	0.096	0.742	9.95577e-102	11	IER2
3.55739e-105	-1.85341	0.092	0.73	7.00059e-101	11	ZFP36
7.25693e-105	-1.73265	0.068	0.712	1.42809e-100	11	STK4
7.75855e-105	1.82111	0.704	0.426	1.52681e-100	11	RPS27L
1.51579e-104	-1.67901	0.075	0.721	2.98292e-100	11	N4BP2L2
4.37842e-104	2.22088	0.489	0.161	8.6163e-100	11	LY96
9.57474e-102	2.04105	0.654	0.352	1.88421e-97	11	KRTCAP2
1.46916e-101	-1.58426	0.134	0.789	2.89116e-97	11	TSC22D3
2.01102e-101	2.03636	0.631	0.318	3.95749e-97	11	TMED10
5.64565e-101	-1.90394	0.049	0.655	1.11101e-96	11	KMT2E
1.04121e-100	-1.47381	0.186	0.849	2.049e-96	11	DNAJA1
3.96026e-100	-1.98736	0.033	0.636	7.7934e-96	11	STK17A
1.03071e-99	-2.08746	0.038	0.64	2.02834e-95	11	HSPH1
9.25625e-99	-1.79963	0.073	0.688	1.82154e-94	11	CD48
2.94787e-98	2.11497	0.574	0.252	5.80112e-94	11	PHPT1
4.83414e-98	-1.5841	0.085	0.71	9.51311e-94	11	CHD2
3.07876e-96	-2.02165	0.028	0.611	6.05868e-92	11	ARID4B
1.03184e-95	-1.43886	0.106	0.743	2.03055e-91	11	MBNL1
1.59208e-95	1.41832	0.755	0.611	3.13305e-91	11	SELK
2.08143e-94	-1.65299	0.075	0.679	4.09605e-90	11	SF1
6.76205e-94	-2.12771	0.064	0.641	1.3307e-89	11	TNFAIP3
6.01469e-93	2.20016	0.466	0.159	1.18363e-88	11	TXNDC15
1.2699e-92	2.01617	0.299	0.062	2.49904e-88	11	SPAG4
7.53478e-92	1.87704	0.584	0.267	1.48277e-87	11	CD79A
9.51982e-92	-1.38597	0.127	0.759	1.87341e-87	11	HNRNPH1
3.63962e-91	-1.62688	0.073	0.662	7.16242e-87	11	CLK1
5.34948e-91	-1.90237	0.078	0.653	1.05272e-86	11	CXCR4
7.33973e-91	-1.70357	0.068	0.646	1.44439e-86	11	AKAP13
1.03417e-90	-1.34382	0.207	0.856	2.03514e-86	11	NEAT1
1.49361e-90	-1.31695	0.125	0.759	2.93927e-86	11	PRRC2C
1.51275e-90	2.06016	0.532	0.219	2.97694e-86	11	NUCB2
9.55474e-90	-1.56348	0.099	0.691	1.88028e-85	11	DDX3X
1.7492e-89	1.88503	0.635	0.356	3.44225e-85	11	GSTP1
3.06782e-89	-1.9258	0.101	0.675	6.03717e-85	11	HSPA1B
9.91104e-89	-1.34282	0.214	0.839	1.95039e-84	11	FOSB
9.7445e-88	2.12303	0.447	0.151	1.91762e-83	11	ALG5
1.54785e-87	-1.91224	0.031	0.58	3.04602e-83	11	JMJD1C
8.43955e-87	-1.17132	0.179	0.823	1.66082e-82	11	SRSF5
8.62772e-87	-1.63941	0.059	0.626	1.69785e-82	11	TAF1D
5.25762e-86	-1.34748	0.118	0.719	1.03465e-81	11	SFPQ
1.022e-85	-1.99265	0.026	0.571	2.01119e-81	11	TUBA1A
1.94196e-85	-1.37216	0.127	0.731	3.82159e-81	11	DDX24
3.40804e-85	-1.4737	0.089	0.67	6.70668e-81	11	RSRC2
2.04373e-84	-2.08054	0.038	0.578	4.02185e-80	11	NR4A2
2.11839e-84	2.07245	0.471	0.173	4.16877e-80	11	SEL1L
3.27401e-84	-2.32099	0.019	0.547	6.44293e-80	11	CD3D
8.80372e-84	-2.37979	0.009	0.533	1.73248e-79	11	CD2
9.88628e-84	-1.27373	0.153	0.768	1.94552e-79	11	MTRNR2L8
1.0389e-83	1.94191	0.574	0.285	2.04444e-79	11	TMED9
1.2159e-83	-1.7287	0.061	0.62	2.39278e-79	11	LAPTM5
2.3806e-83	-1.1633	0.188	0.84	4.68478e-79	11	SON
1.06231e-82	-2.07932	0.012	0.531	2.09052e-78	11	LINC-PINT
1.09698e-82	1.90842	0.574	0.284	2.15875e-78	11	P4HB
1.24935e-82	-1.6701	0.085	0.646	2.45859e-78	11	MTRNR2L2
2.83875e-82	-1.50474	0.094	0.666	5.58638e-78	11	CD37
2.95664e-82	-1.73082	0.031	0.566	5.81837e-78	11	ACAP1
4.21454e-82	-1.82865	0.031	0.562	8.29379e-78	11	ETS1
3.53883e-81	-2.18265	0.024	0.544	6.96406e-77	11	DUSP2
2.74986e-80	-1.17003	0.186	0.81	5.41146e-76	11	YWHAZ
1.31656e-79	-1.6963	0.031	0.554	2.59086e-75	11	EPC1
1.33536e-79	-1.30191	0.144	0.729	2.62786e-75	11	MCL1
1.83165e-79	-1.77225	0.033	0.553	3.6045e-75	11	RHOH
1.67894e-78	-1.22346	0.155	0.753	3.30398e-74	11	STK17B
2.03171e-78	-1.45644	0.08	0.623	3.9982e-74	11	ELF1
2.05228e-78	-1.77752	0.038	0.551	4.03868e-74	11	NKTR
2.82432e-78	-1.25241	0.144	0.724	5.55798e-74	11	ANKRD12
3.30625e-77	1.50991	0.696	0.529	6.50636e-73	11	HSPA5
4.33874e-77	-2.22737	0.021	0.522	8.5382e-73	11	IL32
6.66091e-77	-1.68727	0.049	0.57	1.3108e-72	11	FAM133B
8.04029e-77	-1.26316	0.162	0.736	1.58225e-72	11	YPEL5
9.24293e-77	-1.82578	0.047	0.562	1.81892e-72	11	SLC2A3
1.05946e-76	-1.4541	0.073	0.602	2.08492e-72	11	RBM25
1.15041e-76	-1.19972	0.148	0.732	2.2639e-72	11	HNRNPU
1.67527e-76	-1.34922	0.096	0.651	3.29676e-72	11	DNAJB6
1.12676e-75	-1.54118	0.052	0.571	2.21736e-71	11	TRA2A
1.4425e-75	1.82579	0.593	0.339	2.8387e-71	11	REEP5
1.53636e-75	-1.45149	0.068	0.601	3.02341e-71	11	GLS
4.20044e-75	-1.82977	0.024	0.521	8.26605e-71	11	WSB1
7.13097e-75	-1.9966	0.016	0.509	1.4033e-70	11	ARL4C
1.91936e-74	-1.53494	0.061	0.583	3.77711e-70	11	STAT3
2.14465e-74	-1.43302	0.092	0.634	4.22045e-70	11	IRF1
2.38786e-74	-1.94538	0.056	0.557	4.69906e-70	11	KLF2
1.21718e-73	1.39769	0.706	0.622	2.3953e-69	11	COX7A2
1.52326e-73	1.29708	0.722	0.68	2.99762e-69	11	NDUFA4
2.26819e-73	-1.32502	0.068	0.589	4.46358e-69	11	FNBP1
3.71881e-73	1.9976	0.348	0.102	7.31824e-69	11	SIL1
8.52709e-73	-1.81535	0.016	0.5	1.67805e-68	11	EVL
1.12743e-72	-1.12345	0.341	0.889	2.21868e-68	11	FOS
1.99363e-72	-1.81793	0.021	0.503	3.92326e-68	11	EML4
2.13188e-72	-1.54411	0.061	0.578	4.19533e-68	11	IER5
1.1981e-71	-1.04567	0.242	0.87	2.35775e-67	11	PNRC1
2.68069e-71	-1.34644	0.108	0.646	5.27533e-67	11	SLC38A2
5.16436e-71	-1.48182	0.059	0.566	1.0163e-66	11	LCP1
8.08842e-71	-2.18406	0.002	0.464	1.59172e-66	11	FYB
8.36762e-71	-1.46891	0.061	0.563	1.64666e-66	11	KIAA1551
1.02587e-70	-1.64585	0.038	0.525	2.01881e-66	11	GOLGB1
1.34565e-70	-1.39225	0.087	0.607	2.6481e-66	11	RNF213
1.723e-70	-1.26679	0.094	0.619	3.3907e-66	11	SF3B1
1.97637e-70	-1.62812	0.052	0.549	3.88929e-66	11	BIRC3
2.07519e-70	-2.07771	0.005	0.468	4.08378e-66	11	CD3E
2.91239e-70	-1.64408	0.047	0.539	5.73129e-66	11	RNF19A
3.20076e-70	2.0197	0.409	0.149	6.29877e-66	11	CD59
3.36318e-70	1.6858	0.631	0.432	6.61841e-66	11	COPE
1.09887e-69	-1.06838	0.233	0.829	2.16248e-65	11	MT-ND4L
1.44759e-69	1.98401	0.499	0.235	2.84871e-65	11	KDELR2
2.76892e-69	-1.33491	0.08	0.589	5.44897e-65	11	BCLAF1
3.50043e-69	-1.45508	0.066	0.568	6.88851e-65	11	PNN
3.52543e-69	-1.91864	0.024	0.488	6.93769e-65	11	NFKBIZ
4.36247e-69	-1.33729	0.104	0.621	8.58491e-65	11	CORO1A
6.46713e-69	1.91633	0.558	0.313	1.27267e-64	11	LMAN2
8.85771e-69	1.88899	0.414	0.15	1.74311e-64	11	SLAMF7
1.71581e-68	-1.48513	0.052	0.541	3.37655e-64	11	WHSC1L1
7.37156e-68	-2.07313	0.002	0.45	1.45065e-63	11	RP11-138A9.2
2.16109e-67	-1.0203	0.176	0.75	4.25281e-63	11	HNRNPDL
2.60005e-67	-1.58299	0.04	0.517	5.11663e-63	11	LRRFIP1
2.64084e-67	-1.52077	0.066	0.56	5.1969e-63	11	VMP1
7.36638e-67	-1.57142	0.052	0.531	1.44963e-62	11	PPP1R10
1.17309e-66	-1.70648	0.024	0.48	2.30852e-62	11	SMG1
1.53985e-66	-1.4443	0.04	0.513	3.03027e-62	11	DAZAP2
6.06787e-66	-1.42322	0.054	0.531	1.1941e-61	11	TNRC6B
3.07537e-65	1.94829	0.44	0.183	6.05202e-61	11	CLPTM1L
3.932e-65	1.9446	0.473	0.217	7.73779e-61	11	TMEM208
4.26468e-65	-1.74756	0.012	0.456	8.39246e-61	11	DEK
4.81881e-65	-1.74864	0.019	0.464	9.48293e-61	11	CELF2
6.60913e-65	-1.38649	0.064	0.542	1.30061e-60	11	PRPF38B
1.58041e-64	-1.54096	0.042	0.501	3.11009e-60	11	AKAP9
2.29269e-64	-1.57116	0.042	0.503	4.51179e-60	11	CHORDC1
2.83095e-64	-1.28971	0.092	0.579	5.57104e-60	11	EZR
3.52778e-64	-1.69877	0.04	0.501	6.94231e-60	11	7SK.2
3.84163e-64	-1.30629	0.066	0.553	7.55995e-60	11	IDS
4.18398e-64	-1.72366	0.012	0.452	8.23364e-60	11	MACF1
4.35404e-64	-1.12121	0.129	0.661	8.56832e-60	11	ARHGDIB
4.88582e-64	1.52287	0.635	0.48	9.61481e-60	11	DAD1
1.12418e-63	-1.91714	0.009	0.445	2.21228e-59	11	FYN
1.64849e-63	-1.48854	0.052	0.519	3.24406e-59	11	PRPF4B
1.65147e-63	-1.03738	0.139	0.674	3.24992e-59	11	TPM3
1.83545e-63	-1.8349	0.019	0.461	3.61198e-59	11	TSPYL2
2.22121e-63	-1.77127	0.019	0.46	4.37112e-59	11	KDM6B
2.2855e-63	1.47899	0.652	0.526	4.49763e-59	11	NDUFB11
3.75245e-63	-1.9922	0.007	0.439	7.38445e-59	11	CD3G
5.58125e-63	-1.5582	0.054	0.518	1.09833e-58	11	AHNAK
1.10017e-62	-1.57182	0.033	0.478	2.16502e-58	11	DHX36
2.9485e-61	-1.09091	0.068	0.547	5.80236e-57	11	SRSF11
7.39721e-61	-1.3472	0.061	0.521	1.4557e-56	11	DDX21
7.87214e-61	-1.5735	0.047	0.494	1.54916e-56	11	DDIT4
9.49539e-61	1.65384	0.581	0.376	1.8686e-56	11	UQCRQ
2.36653e-60	1.38177	0.659	0.552	4.6571e-56	11	MIF
2.98872e-60	-1.13656	0.172	0.678	5.8815e-56	11	HSPD1
4.17395e-60	-1.68307	0.019	0.444	8.21391e-56	11	IFRD1
4.67137e-60	-1.57207	0.031	0.462	9.19279e-56	11	PPP1R15B
7.55577e-60	-2.07632	0.007	0.423	1.4869e-55	11	ID2
1.0067e-59	-1.66118	0.031	0.462	1.98108e-55	11	RAB11FIP1
1.18695e-59	-1.58425	0.028	0.456	2.33579e-55	11	ZC3HAV1
5.2103e-59	-2.16475	0.014	0.432	1.02534e-54	11	IL7R
5.50254e-59	-1.34199	0.195	0.666	1.08285e-54	11	HSPA1A
7.04198e-59	-1.41487	0.042	0.482	1.38579e-54	11	TAGAP
7.89231e-59	1.84631	0.468	0.225	1.55313e-54	11	NPC2
8.86892e-59	1.85077	0.496	0.263	1.74531e-54	11	TMED2
8.99639e-59	-1.66459	0.049	0.485	1.7704e-54	11	ZNF331
1.91395e-58	-1.42757	0.075	0.533	3.76647e-54	11	GADD45B
2.98478e-58	-1.28511	0.085	0.547	5.87376e-54	11	AMD1
3.73166e-58	1.55327	0.607	0.434	7.34354e-54	11	PRDX1
4.95399e-58	1.38976	0.652	0.548	9.74896e-54	11	SEC62
6.33361e-58	1.86984	0.398	0.16	1.24639e-53	11	PDIA4
6.80043e-58	-1.29398	0.042	0.477	1.33826e-53	11	YTHDC1
2.66286e-57	-1.33884	0.052	0.488	5.24024e-53	11	USP15
2.77163e-57	-1.3575	0.042	0.474	5.45429e-53	11	KMT2A
5.54129e-57	-1.84804	0.009	0.412	1.09047e-52	11	NABP1
5.89177e-57	-1.80802	0.005	0.405	1.15944e-52	11	FOXP1
8.01626e-57	-1.55698	0.033	0.452	1.57752e-52	11	NUFIP2
9.35058e-57	1.36675	0.647	0.526	1.8401e-52	11	CALR
5.57487e-56	1.91333	0.36	0.135	1.09708e-51	11	SRPRB
6.56249e-56	-1.06094	0.096	0.563	1.29143e-51	11	SMCHD1
6.67658e-56	-1.3148	0.092	0.539	1.31388e-51	11	CREM
8.00899e-56	-1.08961	0.092	0.555	1.57609e-51	11	TAF7
1.31111e-55	-1.73456	0.028	0.435	2.58014e-51	11	RGS2
1.46462e-55	-1.41395	0.059	0.491	2.88224e-51	11	HCST
1.75524e-55	-1.37498	0.042	0.465	3.45413e-51	11	COTL1
2.88014e-55	1.7524	0.471	0.236	5.66783e-51	11	TPD52
3.0094e-55	-1.33479	0.052	0.479	5.9222e-51	11	GCC2
3.95973e-55	1.56959	0.593	0.431	7.79236e-51	11	NDUFB4
4.302e-55	-1.67951	0.026	0.433	8.46591e-51	11	MYADM
7.32974e-55	-1.37183	0.08	0.517	1.44242e-50	11	NR4A1
7.80219e-55	-1.17044	0.085	0.531	1.53539e-50	11	MT-ATP8
1.43078e-54	-1.68165	0.024	0.424	2.81563e-50	11	PMAIP1
1.54554e-54	-1.42201	0.045	0.461	3.04146e-50	11	ARID5B
1.6747e-54	-1.53289	0.042	0.456	3.29563e-50	11	SYNE2
3.80972e-54	-1.36449	0.052	0.469	7.49714e-50	11	CNOT6L
4.26648e-54	-1.54284	0.021	0.418	8.396e-50	11	CHD1
4.65732e-54	-1.18923	0.078	0.522	9.16514e-50	11	TNFAIP8
5.32273e-54	1.65501	0.471	0.227	1.04746e-49	11	RRBP1
8.98793e-54	-1.33992	0.047	0.461	1.76873e-49	11	PRDM2
9.02494e-54	-1.07386	0.068	0.507	1.77602e-49	11	TAGLN2
9.35985e-54	-1.13786	0.068	0.502	1.84192e-49	11	SCAF11
9.50302e-54	-1.52497	0.019	0.414	1.8701e-49	11	MGEA5
9.92486e-54	-1.36547	0.042	0.455	1.95311e-49	11	IQGAP1
1.05341e-53	-1.1778	0.071	0.504	2.073e-49	11	WIPF1
1.18976e-53	-1.18751	0.068	0.501	2.34132e-49	11	IFI16
1.2551e-53	-1.58675	0.019	0.408	2.46992e-49	11	FNBP4
1.4856e-53	-1.22538	0.066	0.494	2.92351e-49	11	IFITM2
1.51388e-53	-1.15329	0.073	0.506	2.97916e-49	11	MYCBP2
1.97666e-53	-1.53159	0.028	0.424	3.88986e-49	11	MDM4
2.16396e-53	-1.7255	0.014	0.402	4.25845e-49	11	SPOCK2
1.30235e-52	-1.52197	0.024	0.415	2.5629e-48	11	ZNF292
3.38051e-52	1.78321	0.461	0.235	6.65251e-48	11	UBE2J1
8.16902e-52	-1.74343	0.021	0.403	1.60758e-47	11	RORA
1.347e-51	-1.45128	0.026	0.414	2.65075e-47	11	CREBRF
3.67433e-51	-1.51357	0.026	0.409	7.23071e-47	11	RUNX3
1.25759e-50	-1.15046	0.059	0.467	2.47482e-46	11	RNMT
2.66109e-50	-1.21446	0.141	0.584	5.23676e-46	11	S100A4
5.20138e-50	-1.17788	0.162	0.609	1.02358e-45	11	RGS1
1.07262e-49	-1.37945	0.031	0.414	2.11082e-45	11	CD97
1.10816e-49	-1.262	0.049	0.445	2.18076e-45	11	SIK1
1.62254e-49	-1.15829	0.068	0.476	3.193e-45	11	LIMD2
1.69442e-49	-1.00579	0.111	0.552	3.33445e-45	11	PPP1R2
1.90953e-49	1.32548	0.621	0.531	3.75776e-45	11	NDUFA1
1.96019e-49	-1.15158	0.059	0.462	3.85746e-45	11	TPR
2.47778e-49	-1.14362	0.064	0.471	4.87601e-45	11	FXYD5
3.29522e-49	-2.22582	0.005	0.362	6.48467e-45	11	KLRB1
3.46155e-49	-1.64755	0.016	0.384	6.81198e-45	11	CD7
4.72168e-49	-1.08902	0.066	0.475	9.29179e-45	11	BPTF
4.89758e-49	-1.34277	0.031	0.412	9.63794e-45	11	APBB1IP
8.12582e-49	-1.2355	0.042	0.429	1.59908e-44	11	PCM1
1.13618e-48	-1.4945	0.019	0.385	2.23589e-44	11	AAK1
2.13661e-48	-1.65682	0.002	0.355	4.20464e-44	11	LBH
2.14104e-48	-1.46333	0.028	0.4	4.21336e-44	11	PDE4B
3.60221e-48	-1.1975	0.108	0.533	7.08879e-44	11	GPR183
3.61837e-48	-1.26131	0.045	0.428	7.12059e-44	11	IKZF1
3.92239e-48	1.65555	0.529	0.354	7.71888e-44	11	PRDX2
5.36907e-48	-1.02201	0.075	0.49	1.05658e-43	11	ATM
1.15018e-47	-1.47384	0.021	0.386	2.26344e-43	11	ARL4A
1.28699e-47	-1.1219	0.085	0.495	2.53267e-43	11	YME1L1
1.90875e-47	-1.18043	0.061	0.455	3.75622e-43	11	VPS13C
2.57049e-47	-1.20763	0.049	0.432	5.05846e-43	11	ARF6
3.02609e-47	-1.20825	0.045	0.426	5.95504e-43	11	SDCBP
3.99407e-47	-1.12514	0.049	0.436	7.85993e-43	11	ROCK1
5.27143e-47	-1.01301	0.092	0.51	1.03736e-42	11	LUC7L3
6.71102e-47	-1.1943	0.045	0.423	1.32066e-42	11	ASH1L
9.47429e-47	1.5783	0.539	0.366	1.86445e-42	11	TRAM1
1.0821e-46	-1.22969	0.042	0.417	2.12946e-42	11	NASP
1.5915e-46	-1.17637	0.056	0.442	3.13191e-42	11	ZCCHC11
1.92301e-46	-1.2929	0.031	0.395	3.7843e-42	11	RP11-349A22.5
2.16788e-46	-1.10064	0.075	0.47	4.26617e-42	11	ANKRD11
2.23615e-46	-1.63066	0.002	0.344	4.40051e-42	11	PIK3IP1
3.20599e-46	-1.25733	0.049	0.427	6.30908e-42	11	TANK
3.62514e-46	-1.29211	0.035	0.399	7.13391e-42	11	RGS10
5.00022e-46	-1.04809	0.071	0.465	9.83992e-42	11	RBMX
5.34263e-46	-1.35764	0.024	0.382	1.05138e-41	11	GNG2
5.95061e-46	-1.14118	0.064	0.451	1.17102e-41	11	BOD1L1
6.34388e-46	-1.77951	0.002	0.342	1.24841e-41	11	PTGER4
9.26541e-46	-1.45154	0.026	0.379	1.82334e-41	11	UTRN
1.78593e-45	-1.06253	0.085	0.483	3.51453e-41	11	G3BP2
2.06809e-45	-1.27531	0.038	0.4	4.06979e-41	11	IVNS1ABP
2.10216e-45	1.77652	0.398	0.189	4.13684e-41	11	HM13
2.23406e-45	1.08643	0.661	0.682	4.39641e-41	11	EDF1
3.0551e-45	-1.14094	0.054	0.429	6.01214e-41	11	NR3C1
3.32624e-45	-1.51326	0.012	0.355	6.54571e-41	11	RP11-489E7.4
3.34202e-45	1.64555	0.508	0.33	6.57676e-41	11	OSTC
3.8098e-45	-1.48547	0.014	0.359	7.4973e-41	11	MIDN
5.70802e-45	-1.23087	0.024	0.376	1.12328e-40	11	WNK1
6.76629e-45	-1.05102	0.066	0.447	1.33154e-40	11	ZFAND5
9.99627e-45	-1.46918	0.024	0.372	1.96717e-40	11	CHMP1B
1.08009e-44	-1.45411	0.012	0.353	2.1255e-40	11	TIPARP
2.9204e-44	-1.65555	0.002	0.332	5.74705e-40	11	TMEM2
3.1341e-44	-1.12016	0.075	0.457	6.16759e-40	11	TUBB4B
3.2335e-44	-1.45689	0.007	0.341	6.36321e-40	11	LCK
3.59752e-44	-1.25125	0.056	0.429	7.07956e-40	11	NAMPT
4.41719e-44	-1.66404	0.024	0.369	8.69258e-40	11	XIST
4.81844e-44	-1.57321	0.007	0.34	9.48222e-40	11	PTPN22
6.83172e-44	-1.24933	0.031	0.382	1.34441e-39	11	JOSD1
7.10241e-44	1.78186	0.329	0.133	1.39768e-39	11	NME1
1.05291e-43	-1.17894	0.045	0.402	2.07202e-39	11	MSN
1.52692e-43	1.30944	0.609	0.533	3.00482e-39	11	ATP5I
2.10865e-43	-1.59972	0.002	0.326	4.14962e-39	11	RP11-138A9.1
3.20129e-43	1.56139	0.365	0.157	6.29983e-39	11	FCRL5
3.52661e-43	1.20241	0.621	0.565	6.94001e-39	11	ISG20
4.40489e-43	1.74764	0.407	0.207	8.66838e-39	11	KDELR1
4.55261e-43	-1.14228	0.045	0.405	8.95908e-39	11	PPP1R12A
6.6841e-43	-1.20227	0.033	0.379	1.31536e-38	11	BAZ1A
6.79086e-43	-1.35157	0.019	0.356	1.33637e-38	11	MBP
1.05925e-42	-1.01298	0.092	0.486	2.08449e-38	11	CACYBP
1.40247e-42	-1.12471	0.045	0.4	2.75993e-38	11	PHF3
2.39428e-42	1.84721	0.336	0.142	4.7117e-38	11	LAMP2
3.09279e-42	-1.39836	0.031	0.369	6.08631e-38	11	TLE4
7.74056e-42	-1.1409	0.052	0.407	1.52326e-37	11	CCNH
8.32644e-42	-1.14291	0.033	0.377	1.63856e-37	11	RAB8B
1.8432e-41	-1.46357	0.005	0.321	3.62724e-37	11	ODF2L
4.03917e-41	-1.5044	0.005	0.318	7.94867e-37	11	CLEC2D
6.18529e-41	-1.71233	0.005	0.317	1.2172e-36	11	MAF
7.25266e-41	1.40399	0.581	0.497	1.42725e-36	11	ATP5J
7.84277e-41	-1.14394	0.038	0.378	1.54338e-36	11	CDC42SE1
9.09641e-41	-1.53836	0.014	0.333	1.79008e-36	11	RASGEF1B
1.73359e-40	-1.61259	0	0.306	3.41152e-36	11	CCDC64
2.52239e-40	-1.17872	0.042	0.379	4.96382e-36	11	BDP1
3.23668e-40	-1.44566	0.012	0.327	6.36947e-36	11	NFKBID
3.88731e-40	-1.26886	0.026	0.352	7.64984e-36	11	LIMS1
3.93639e-40	-1.43538	0.005	0.312	7.74642e-36	11	PDE7A
5.27811e-40	-1.3262	0.016	0.333	1.03868e-35	11	ITSN2
6.01221e-40	-1.10317	0.04	0.376	1.18314e-35	11	AFF4
6.09512e-40	-1.18153	0.045	0.381	1.19946e-35	11	IDI1
1.58352e-39	-1.03606	0.089	0.457	3.1162e-35	11	SAMSN1
1.95424e-39	-1.529	0.009	0.317	3.84576e-35	11	LINC00936
8.0159e-39	-1.18572	0.035	0.359	1.57745e-34	11	PARP14
8.53901e-39	-1.44049	0.005	0.305	1.68039e-34	11	FAM65B
9.12092e-39	-1.028	0.045	0.38	1.79491e-34	11	USP34
1.09368e-38	-1.04352	0.049	0.386	2.15226e-34	11	MYH9
1.47414e-38	-1.09613	0.038	0.361	2.90096e-34	11	SMEK1
1.79822e-38	-1.3795	0.045	0.373	3.53872e-34	11	CD83
2.16066e-38	-1.5367	0	0.293	4.25197e-34	11	BCL11B
2.19795e-38	-1.2399	0.024	0.335	4.32534e-34	11	SPTAN1
2.57407e-38	-1.0113	0.052	0.386	5.06551e-34	11	UPF2
2.66443e-38	1.05215	0.626	0.643	5.24333e-34	11	UQCRH
3.71728e-38	-1.43716	0.007	0.305	7.31523e-34	11	CD247
3.98754e-38	-1.40214	0.007	0.304	7.84709e-34	11	SNHG12
5.64171e-38	-1.04407	0.033	0.35	1.11023e-33	11	KDM2A
9.26228e-38	-1.51534	0.009	0.307	1.82272e-33	11	GIMAP7
1.06827e-37	-1.39065	0.007	0.302	2.10225e-33	11	TRIM22
1.12192e-37	1.03315	0.635	0.631	2.20783e-33	11	DYNLL1
2.17824e-37	-1.20646	0.042	0.358	4.28655e-33	11	RBBP6
2.20021e-37	-1.15262	0.026	0.336	4.3298e-33	11	DNTTIP2
2.75506e-37	-1.20857	0.016	0.317	5.42168e-33	11	OFD1
3.48155e-37	-1.47308	0.059	0.379	6.85134e-33	11	HLA-DPB1
4.29218e-37	-1.08488	0.04	0.357	8.44659e-33	11	DNAJB14
4.66487e-37	-1.09712	0.042	0.362	9.18e-33	11	SNHG7
7.04866e-37	-1.26595	0.024	0.327	1.38711e-32	11	NFKB1
7.23786e-37	-1.23803	0.014	0.31	1.42434e-32	11	SRSF10
7.28995e-37	-1.54807	0	0.284	1.43459e-32	11	AHR
8.07167e-37	-1.16138	0.04	0.357	1.58842e-32	11	CITED2
8.3118e-37	1.68022	0.296	0.122	1.63568e-32	11	CALU
9.56747e-37	-1.45063	0.007	0.296	1.88278e-32	11	ZBTB10
9.76759e-37	-1.20994	0.012	0.306	1.92216e-32	11	CSRNP1
1.03942e-36	-1.18226	0.019	0.318	2.04548e-32	11	FMNL1
1.29801e-36	-1.18566	0.035	0.341	2.55435e-32	11	ARHGEF1
1.45478e-36	-1.58236	0.007	0.293	2.86287e-32	11	ICOS
3.29887e-36	-1.44672	0.005	0.288	6.49184e-32	11	MYLIP
3.43123e-36	-1.01999	0.042	0.359	6.75231e-32	11	NDNL2
3.76098e-36	1.51943	0.494	0.354	7.40123e-32	11	PRDX5
4.51233e-36	-1.24908	0.012	0.301	8.87982e-32	11	ANKRD44
4.73393e-36	-1.02305	0.047	0.367	9.3159e-32	11	ATP2B1
4.96312e-36	-1.46061	0.005	0.286	9.76693e-32	11	SOCS1
9.42465e-36	-1.21863	0.016	0.306	1.85468e-31	11	LNPEP
9.62504e-36	1.7516	0.332	0.153	1.89411e-31	11	RPN1
1.16285e-35	-1.04949	0.056	0.381	2.28836e-31	11	SOCS3
1.42657e-35	1.58494	0.445	0.277	2.80736e-31	11	GLRX
2.69588e-35	-1.13927	0.016	0.305	5.30522e-31	11	KANSL1
2.9597e-35	-1.26243	0.021	0.313	5.8244e-31	11	ARRDC3
4.03278e-35	-1.14547	0.035	0.335	7.9361e-31	11	NIPBL
4.52913e-35	1.2565	0.576	0.523	8.91288e-31	11	ATPIF1
6.26151e-35	-1.28491	0.007	0.285	1.2322e-30	11	PCSK7
6.64153e-35	-1.39637	0.016	0.3	1.30699e-30	11	DDX3Y
9.36545e-35	-1.11864	0.038	0.339	1.84303e-30	11	ATF7IP
9.73394e-35	-1.10297	0.026	0.318	1.91554e-30	11	SPTY2D1
1.71026e-34	-1.0075	0.049	0.356	3.36562e-30	11	OGT
1.89572e-34	-1.26603	0.021	0.306	3.73058e-30	11	SPAG9
2.39301e-34	-1.26841	0.016	0.299	4.70921e-30	11	RALGAPA1
2.64713e-34	-1.17261	0.028	0.32	5.20928e-30	11	PIK3R1
2.92494e-34	-1.02975	0.04	0.34	5.75599e-30	11	ZNF644
3.78701e-34	-1.10131	0.028	0.32	7.45246e-30	11	ZBTB1
5.1385e-34	-1.7276	0.016	0.293	1.01121e-29	11	ANXA1
5.58819e-34	-1.16998	0.024	0.309	1.0997e-29	11	INTS6
8.87282e-34	-1.08327	0.024	0.309	1.74608e-29	11	ACAP2
1.015e-33	-1.14897	0.021	0.303	1.99742e-29	11	RILPL2
1.01676e-33	-1.33643	0.012	0.285	2.00088e-29	11	USP36
1.70391e-33	-1.14721	0.026	0.311	3.35312e-29	11	ZNF638
1.80722e-33	-1.13665	0.016	0.294	3.55642e-29	11	NFAT5
1.85793e-33	-1.4406	0.012	0.282	3.65622e-29	11	DNAJB4
3.06014e-33	-1.11679	0.026	0.31	6.02205e-29	11	SKAP1
3.29925e-33	-1.22832	0.009	0.279	6.49259e-29	11	ARAP2
3.77334e-33	-1.0831	0.021	0.3	7.42556e-29	11	SNHG15
4.42449e-33	-1.37295	0.002	0.264	8.70695e-29	11	TCF7
4.92825e-33	-1.22736	0.016	0.29	9.69831e-29	11	SLA
5.14042e-33	-1.49645	0.009	0.276	1.01158e-28	11	PHLDA1
5.78799e-33	-1.01226	0.045	0.338	1.13902e-28	11	RBM33
6.02043e-33	-1.36454	0.002	0.263	1.18476e-28	11	SYTL3
6.66739e-33	-1.03411	0.026	0.307	1.31208e-28	11	BCL2
7.60354e-33	-1.22099	0.009	0.276	1.4963e-28	11	AKNA
8.23703e-33	-1.23407	0.009	0.276	1.62097e-28	11	ZNF267
1.10158e-32	-1.15609	0.012	0.279	2.1678e-28	11	MLLT6
1.1208e-32	-1.19225	0.016	0.287	2.20563e-28	11	ELOVL5
1.45303e-32	-1.03981	0.028	0.308	2.85942e-28	11	BIRC6
1.55612e-32	-1.11884	0.014	0.284	3.0623e-28	11	KAT6A
1.64794e-32	1.23182	0.553	0.476	3.24298e-28	11	EMP3
2.56969e-32	-1.20229	0.031	0.307	5.05689e-28	11	SERTAD1
2.57578e-32	-1.00566	0.035	0.319	5.06888e-28	11	TRAF3IP3
2.72797e-32	1.51754	0.461	0.315	5.36838e-28	11	NDUFB7
3.33369e-32	-1.19184	0.009	0.271	6.56036e-28	11	DDX39B
4.01507e-32	-1.27024	0.009	0.272	7.90125e-28	11	LCP2
7.39094e-32	-1.10824	0.028	0.304	1.45446e-27	11	IFITM1
8.24175e-32	-1.00715	0.047	0.335	1.62189e-27	11	TBC1D10C
8.79658e-32	-1.14453	0.028	0.302	1.73108e-27	11	RCSD1
9.46538e-32	-1.43002	0.002	0.255	1.86269e-27	11	GIMAP4
1.04317e-31	-1.27078	0.007	0.264	2.05285e-27	11	TFRC
1.05528e-31	-1.21854	0.019	0.285	2.07668e-27	11	SLFN5
1.07807e-31	-1.29725	0.002	0.255	2.12153e-27	11	POLR2J3
1.26703e-31	-1.28513	0.007	0.262	2.4934e-27	11	ALOX5AP
1.47411e-31	-1.27493	0.002	0.254	2.90089e-27	11	FAIM3
1.51013e-31	1.62281	0.301	0.138	2.97179e-27	11	MRPL40
1.87013e-31	-1.05085	0.031	0.304	3.68024e-27	11	PTPN7
2.07423e-31	-1.31842	0.014	0.276	4.08187e-27	11	ZEB2
2.10109e-31	-1.01822	0.038	0.316	4.13473e-27	11	SIAH2
2.56333e-31	-1.29936	0.007	0.261	5.04439e-27	11	LYST
2.82378e-31	-1.28147	0.007	0.262	5.55692e-27	11	PDE4D
3.55815e-31	-1.13353	0.016	0.277	7.00209e-27	11	RICTOR
4.18176e-31	-1.22029	0.007	0.259	8.22929e-27	11	CCND3
4.58441e-31	-1.23999	0.005	0.256	9.02166e-27	11	RCAN3
5.57493e-31	-1.07975	0.014	0.272	1.09709e-26	11	DCP2
5.62822e-31	-1.2527	0.007	0.258	1.10758e-26	11	TGFBR2
1.05047e-30	-1.1866	0.014	0.271	2.06722e-26	11	ANKRD36C
1.20819e-30	-1.22337	0.007	0.258	2.37759e-26	11	PLK3
1.23634e-30	-1.19591	0.012	0.265	2.433e-26	11	TSC22D2
1.29773e-30	-1.02353	0.026	0.292	2.5538e-26	11	PIP4K2A
1.90577e-30	-1.04751	0.035	0.306	3.75036e-26	11	HECA
1.91739e-30	-1.06892	0.028	0.292	3.77323e-26	11	CENPC
2.13609e-30	-1.1217	0.012	0.263	4.20362e-26	11	WDR26
2.42414e-30	-1.00905	0.024	0.287	4.77046e-26	11	SETD2
2.46106e-30	-1.15863	0.012	0.264	4.84312e-26	11	SERPINB9
2.52196e-30	1.56314	0.261	0.109	4.96297e-26	11	TMEM205
4.23581e-30	1.39191	0.518	0.431	8.33564e-26	11	PSME2
5.43775e-30	-1.04874	0.016	0.27	1.0701e-25	11	WDR82
5.82717e-30	-1.20711	0.012	0.261	1.14673e-25	11	GPRIN3
5.87721e-30	-1.87922	0.007	0.25	1.15658e-25	11	CCL5
6.49657e-30	-1.32877	0.028	0.289	1.27846e-25	11	EGR1
7.21644e-30	-1.11515	0.014	0.266	1.42012e-25	11	GBP2
1.219e-29	1.47864	0.468	0.346	2.39887e-25	11	ATP6V0B
1.22067e-29	1.33383	0.508	0.419	2.40216e-25	11	CUTA
1.23792e-29	-1.24276	0.007	0.25	2.43611e-25	11	TOB1
1.24928e-29	1.40611	0.478	0.357	2.45846e-25	11	NDUFA3
1.40409e-29	-1.01296	0.028	0.286	2.7631e-25	11	NSD1
1.49064e-29	-1.08116	0.016	0.267	2.93343e-25	11	FAM105B
1.57754e-29	-1.05307	0.012	0.259	3.10444e-25	11	LENG8
1.67725e-29	-1.06049	0.019	0.27	3.30067e-25	11	R3HDM2
1.74962e-29	1.62182	0.339	0.179	3.44307e-25	11	IFNAR2
1.81389e-29	-1.04616	0.024	0.278	3.56955e-25	11	CNOT4
2.8141e-29	-1.25508	0.021	0.273	5.53786e-25	11	BCL2A1
3.71075e-29	-1.05381	0.021	0.273	7.30239e-25	11	CNTRL
3.75623e-29	-1.19362	0.012	0.256	7.39188e-25	11	FOSL2
5.61561e-29	-1.07232	0.026	0.278	1.1051e-24	11	CWC25
7.3302e-29	-1.07363	0.021	0.271	1.44251e-24	11	VPS37B
1.08333e-28	-1.14147	0.016	0.26	2.13189e-24	11	PKN2
1.44716e-28	-1.0027	0.024	0.272	2.84786e-24	11	RBM26
1.58718e-28	-1.11783	0.016	0.26	3.12342e-24	11	TNFRSF1B
2.30633e-28	-1.04691	0.019	0.264	4.53862e-24	11	RASGRP1
3.63566e-28	-1.07745	0.019	0.26	7.15461e-24	11	ARID4A
3.69934e-28	1.56658	0.376	0.225	7.27993e-24	11	ATRAID
4.2999e-28	-1.17441	0.019	0.258	8.46177e-24	11	POLR2A
4.4085e-28	-1.00637	0.028	0.278	8.67548e-24	11	CASP8
7.73719e-28	-1.08347	0.014	0.25	1.5226e-23	11	CCSER2
8.02279e-28	1.55287	0.311	0.155	1.5788e-23	11	CD38
1.5129e-27	-1.01373	0.014	0.25	2.97723e-23	11	NFKB2
2.73752e-27	1.41088	0.461	0.346	5.38717e-23	11	NDUFS6
4.32827e-27	-1.10698	0.024	0.262	8.51759e-23	11	HEXIM1
4.50398e-27	-1.02678	0.019	0.254	8.86339e-23	11	CTNNB1
6.81281e-27	-1.02069	0.028	0.27	1.34069e-22	11	BATF
8.50495e-27	1.0165	0.588	0.626	1.67369e-22	11	MZT2B
1.25116e-26	-1.0179	0.026	0.262	2.46215e-22	11	CREBZF
1.35423e-26	-1.00551	0.021	0.254	2.66499e-22	11	DNM1L
1.44009e-26	1.48927	0.407	0.27	2.83395e-22	11	ATP5G1
2.34877e-26	1.50588	0.372	0.227	4.62215e-22	11	DDOST
2.40561e-26	1.56012	0.318	0.168	4.73399e-22	11	SRM
3.38837e-26	1.51913	0.433	0.312	6.66797e-22	11	COX5A
5.07481e-26	-1.08815	0.052	0.299	9.98672e-22	11	ANKRD28
1.63682e-25	1.51091	0.388	0.252	3.22111e-21	11	DERL1
2.17341e-25	1.40433	0.449	0.34	4.27706e-21	11	NDUFB10
2.55153e-25	1.48821	0.414	0.289	5.02115e-21	11	CANX
2.87778e-24	-1.30458	0.033	0.255	5.66318e-20	11	HLA-DQA1
3.67964e-24	1.17227	0.525	0.481	7.24116e-20	11	ZNF706
8.20671e-24	1.50695	0.336	0.196	1.615e-19	11	AKR1A1
1.485e-23	1.35114	0.459	0.363	2.92234e-19	11	DPP7
2.03239e-23	1.48946	0.256	0.122	3.99953e-19	11	VKORC1
5.65906e-23	1.23813	0.518	0.483	1.11365e-18	11	POLR2L
6.22817e-23	1.56888	0.306	0.169	1.22564e-18	11	ERGIC3
1.22375e-22	1.28778	0.485	0.424	2.40822e-18	11	GNG5
1.64032e-22	1.47924	0.329	0.192	3.22799e-18	11	HDLBP
1.7025e-22	1.26091	0.494	0.449	3.35035e-18	11	ATP5G3
2.42588e-22	1.09985	0.536	0.534	4.77389e-18	11	GUK1
3.13433e-22	1.43675	0.282	0.146	6.16804e-18	11	TXNDC11
3.54401e-22	1.36004	0.438	0.343	6.97426e-18	11	ROMO1
8.1678e-22	1.51959	0.304	0.171	1.60734e-17	11	ICAM2
8.76908e-22	1.36638	0.416	0.309	1.72567e-17	11	DNAJB9
2.66835e-21	1.47685	0.372	0.252	5.25104e-17	11	IFI27L2
2.75385e-21	1.31663	0.461	0.395	5.41929e-17	11	PDIA3
3.00156e-21	1.38509	0.376	0.25	5.90677e-17	11	PSAP
4.12216e-21	1.44966	0.311	0.181	8.112e-17	11	CCPG1
4.94824e-21	1.45121	0.362	0.241	9.73764e-17	11	CNPY2
7.56036e-21	1.41632	0.348	0.223	1.4878e-16	11	DNAJB11
9.03625e-21	1.46785	0.369	0.252	1.77824e-16	11	DNAJC3
1.59209e-20	1.09608	0.518	0.51	3.13306e-16	11	NHP2L1
1.8945e-20	1.46115	0.294	0.166	3.72819e-16	11	PDXK
5.30123e-20	1.20256	0.456	0.376	1.04323e-15	11	CTSS
9.15454e-20	1.44895	0.275	0.15	1.80152e-15	11	SEC61A1
1.86426e-19	1.38967	0.36	0.243	3.66868e-15	11	TECR
8.76758e-19	1.42776	0.266	0.146	1.72537e-14	11	ARL1
9.86056e-19	1.16985	0.456	0.392	1.94046e-14	11	TXN
1.01117e-18	1.33107	0.329	0.212	1.98988e-14	11	NANS
1.39747e-18	1.35295	0.388	0.292	2.75008e-14	11	MRPL52
1.82643e-18	1.36616	0.285	0.165	3.59423e-14	11	TMEM147
1.97307e-18	1.26728	0.468	0.427	3.8828e-14	11	ICAM3
2.95335e-18	1.27423	0.421	0.344	5.8119e-14	11	NDUFA11
2.74982e-17	1.32952	0.365	0.265	5.41137e-13	11	DNAJC1
2.85448e-17	1.44113	0.341	0.236	5.61734e-13	11	BSG
3.72159e-17	1.01954	0.522	0.556	7.32372e-13	11	SSR2
4.4623e-17	1.46401	0.268	0.155	8.78135e-13	11	DPM3
6.74812e-17	1.25545	0.438	0.384	1.32796e-12	11	BST2
9.78056e-17	1.35659	0.384	0.298	1.92472e-12	11	NDUFC2
1.65563e-16	1.44559	0.289	0.18	3.25812e-12	11	CISD2
2.0795e-16	1.33064	0.327	0.219	4.09225e-12	11	SEL1L3
1.7179e-15	1.16509	0.478	0.47	3.38065e-11	11	USMG5
2.34295e-15	1.26589	0.386	0.311	4.61068e-11	11	MRPL51
2.65746e-15	1.1217	0.466	0.458	5.22961e-11	11	PSMB1
3.41815e-15	1.33837	0.376	0.302	6.72658e-11	11	PSMB6
3.64701e-15	1.31203	0.313	0.21	7.17696e-11	11	ATOX1
6.39556e-15	1.28339	0.28	0.176	1.25858e-10	11	TMEM238
1.02418e-14	1.17802	0.424	0.375	2.01548e-10	11	CHCHD10
3.50501e-14	1.3004	0.372	0.3	6.89751e-10	11	NDUFB3
3.62914e-14	1.32963	0.351	0.268	7.14178e-10	11	NDUFAB1
1.09883e-13	1.02511	0.485	0.51	2.1624e-09	11	KRT10
6.60395e-13	1.08494	0.459	0.457	1.29959e-08	11	C14orf2
8.51518e-13	1.22719	0.386	0.331	1.6757e-08	11	FIS1
8.73e-13	1.28373	0.339	0.263	1.71798e-08	11	LSMD1
8.84609e-13	1.31711	0.313	0.226	1.74082e-08	11	ST6GAL1
1.15874e-12	1.27901	0.318	0.233	2.28029e-08	11	NDUFC1
1.19983e-12	1.06814	0.426	0.394	2.36114e-08	11	ARF4
1.97181e-12	1.18731	0.4	0.359	3.88032e-08	11	AURKAIP1
2.1642e-12	1.27514	0.292	0.204	4.25893e-08	11	MLEC
4.21944e-12	1.27994	0.256	0.166	8.30343e-08	11	ADI1
8.34673e-12	1.06868	0.454	0.474	1.64255e-07	11	JTB
[truncated: 912 more rows]
